# Supplementary material for: Haematological Features and Urologic Pathologies of Diabetic Subjects at Bafoussam Regional Hospital: A Cross-Sectional Study
Source: Int J Chronic Dis. 2020 May 28;2020:6161785. doi: 10.1155/2020/6161785 (PMC7275945; doi:10.1155/2020/6161785)
Supplement: Supplementary Materials — (.xlsx): all raw data generated to support the findings of this study. [file 6161785.f1.xlsx]

## Sheet: Raw data
codes	Diabetes1/control0	sex	Matrimonial status	Glycemia mg/dl	age (year)	town	profession	educational level	age of diabetes (month)	Type of diabetes	traitment duration (month)	pollakuiria	Dysuria	fiever	burn	urinary leakage	urge to urinate	OBESITy	hopstital attendance	others observations	CRP mg/l	CD4	GB (x 103 cellules/µl)	Lymp (x 103 cellules/µl)	mono (x 103 cellules/µl)	gran (x 103 cellules/µl)	% des lymphocyte	% des mono	% des granulo	Hemoglobine	GR	HCT	MCV	MCh	MCHC	RDW-CV	RDW-SD	PLT	MPV	PDW	PCT (%)	Color of urine	leucocyturia (cell/mm3)	hematuria (cell/mm3)	urine culture culture	isolated bacteria	OX (oxacilline)	S (streptomycine)	VAN (vancomycine)
01T	1	0	1	125	65	1	1	1	60	1	60	0	0	1	0	0	1	1	1	1	˂6	727	4.5	1.9	0.5	2.1	43.2	10.6	46.2	12.6	4.74	42.3	89.3	26.5	29.7	15.3	49.8	180	10.3	14.7	0.185	1	0	0	0
02T	1	0	1	71	64	2	2	2	300	1	12	0	0	0	0	0	1	1	1	1	˂6	807	4.3	2.2	0.4	1.7	50.2	10.3	39.5	13.6	4.94	45.9	93.1	27.5	29.6	15.1	53.9	170	11.7	15.1	0.198	2	0	0	0
03T	1	1	1	169	64	2	3	3	132	1	132	0	0	1	0	0	1	1	1	1	˂6	891	5.6	1.9	0.5	3.3	32.9	8.5	58.6	12.9	4.5	42.3	94	28.6	30.4	13	44.8	173	10.7	14.9	0.185	2	0	0	0
04T	1	0	1	120	41	3	4	7	1	1	0.5	0	0	0	1	0	1	1	1	2	96	332	16.6	1.6	0.9	14.1	9.9	5.5	84.6	11.3	4.34	36.6	84.5	26	30.8	13.9	40.6	236	9.6	14.7	0.226	2	0	0	0
05T	1	1	1	80	75	4	5	5	24	1	24	0	0	0	0	0	0	0	1	12	˂6	1263	4.6	1.8	0.4	2.4	38.2	10.4	51.4	11.8	4.2	38.7	92.3	28	30.4	12.7	43.7	369	8.7	14.1	0.321	1	0	0	0
06T	1	0	1	118	71	2	1	6	168	1	168	1	0	1	0	0	1	0	1	1	˂6	686	4.8	2.2	0.5	2.1	45.9	9.8	44.3	14.2	4.91	45.8	93.4	28.9	31	13.3	42.7	202	9.6	14.6	0.193	1	0	0	0
07T	1	1	1	189	55	5	5	5	12	1	12	0	1	0	1	0	1	1	1	1	˂6	994	4.8	2.7	0.4	1.7	55.7	9.7	34.6	13.4	4.98	42.3	85	26.9	31.6	12.3	38.6	177	10	14.7	0.177	2	0	0	0
08T	1	1	1	270	75	2	5	5	120	1	120	1	0	0	0	1	1	0	1	4	˂6	1414	5.1	2.2	0.4	2.5	43	8.6	48.4	13.3	5.13	42.6	83.2	25.9	31.2	13.2	38.6	178	9.7	14.7	0.172	1	0	0	0
09T	1	1	1	114	46	2	3	3	48	1	48	1	0	1	0	0	0	1	1	2	24	1003	7.6	2.5	0.6	4.5	33.5	7.6	58.9	10.3	4.19	34.6	82.6	24.5	29.7	14.1	40.6	277	10.3	14.7	0.285	5	40	0	1	1
10T	1	1	1	130	85	2	5	5	60	1	60	1	0	0	0	1	1	1	1	9	˂6	684	4	2.1	0.2	1.7	52	42.1	11.6	11.6	3.51	38.4	109.6	33	30.2	14.6	58.9	86	10.4	15.4	0.089	1	20	0	0
11T	1	0	1	110	73	2	1	1	96	1	96	1	0	0	0	0	1	1	1	9	˂6	619	6.3	3.7	0.5	2.1	58.5	7.4	34.1	16.2	5.61	51.1	91.1	28.8	31.7	12.8	41.7	145	10.4	15.1	0.15	2	0	0	0
12T	1	1	1	140	56	6	3	1	10	1	10	0	0	1	0	1	1	1	1	9	˂6	790	5.2	2.3	0.5	2.4	43.8	9.2	47	13.5	5.11	44.6	87.4	26.4	30.2	13.8	45.7	188	10.2	14.7	0.191	1	0	60	0
13T	1	0	1	203	70	2	3	5	36	1	36	1	0	1	0	0	1	0	1	12	˂6	903	5.5	2.3	0.4	2.8	41.3	8.2	50.5	10.8	3.88	36.6	94.4	27.8	29.5	15.1	51.9	202	9.5	14.7	0.191	4	20	60	1	2
14T	1	0	1	103	50	2	6	2	60	1	60	0	0	0	0	0	0	1	1	12	˂6	618	4.6	2.1	0.2	2.3	44.9	5.5	49.6	14.1	5.62	46.8	83.3	25	30.1	11.9	36.6	192	10.4	14.4	0.199	3	0	0	0
15T	1	1	1	157	57	2	4	5	15	1	12	1	1	1	0	1	1	1	1	1	˂6	896	5.2	2	0.3	2.9	37.7	6.8	55.5	10.2	3.72	33.4	89.9	27.4	30.5	13.4	44.8	198	10.3	15.1	0.199	1	0	0	1	2
16T	1	0	1	119	37	2	8	8	60	1	60	1	0	0	0	0	0	0	1	12	˂6	712	4.1	2.3	0.2	1.6	54.4	5.9	39.7	13.6	5.15	44.2	85.9	26.4	30.7	14.2	42.7	259	9.8	14.6	0.253	1	0	0	0
17T	1	1	1	180	38	2	9	2	0.5	1		0	0	0	0	0	0	0	0	12	˂6	1102	5.6	2.5	0.4	2.7	44.4	7	48.6	13.7	5.23	45.5	87.1	26.1	30.1	13	40.6	341	9.8	14.6	0.334	1	20	0	1	3
18T	1	0	1	124	65	7	1	3	384	0	384	0	0	1	0	0	1	1	1	12	˂6	400	4.9	1.3	0.3	3.3	26.3	6.9	66.8	9.6	3.85	31.9	83.1	24.9	30	13.5	40.6	198	10.3	15.3	0.203	2	0	0	0
19T	1	1	1	101	66	2	3	3	60	1	36	1	0	1	0	0	0	1	1	11	192	660	6.8	3	0.4	3.4	43.4	7	49.6	13.9	5.35	46.2	86.4	25.9	30	14.9	44.8	216	10.5	14.6	0.226	5	40	20	1	1
20T	1	0	1	245	22	8	10	1	84	0	48	1	1	1	1	0	0	0	1	10	96	809	5.9	2.6	0.6	2.7	44.7	10	45.3	13.5	5.1	42.9	84.2	26.4	31.4	14.1	39.6	233	10.1	14.9	0.235	1	0	0	1	4	S	S	I
21T	1	1	1	136	42	2	11	2	12	1	12	0	0	0	0	0	0	1	1	1	˂6	840	4.9	2.2	0.4	2	40.5	12.5	43.1	12.2	4.4	40.1	82.6	27.2	28.5	13.2	38.6	212	9.5	14.2	0.204	1	6	0	1	4	S	S	R
22T	1	1	1	116	51	2	2	2	120	1	120	1	0	1	0	0	0	1	1	1	˂6	975	4.4	1.8	0.4	2.2	41.2	8.4	50.4	11.9	4.22	39.4	93.4	28.1	30.2	13.9	46.7	231	8.7	14.3	0.2	1	20	10	1	5
23T	1	1	1	120	47	2	4	3	36	1	36	0	0	1	0	0	0	0	0	12	˂6	727	4.8	2	0.5	2.3	42	11.3	46.7	15.7	5.47	52.4	95.9	28.7	29.9	13.5	49.8	267	10.2	14.6	0.272	1	0	0	0
24T	1	0	1	163	60	9	12	5	180	1	120	0	0	1	1	0	1	0	1	11	6	280	4.2	1.5	0.5	2.2	36.3	11.5	52.2	11.3	4.11	37.6	91.6	27.4	30	13.2	48.8	156	10.3	15	0.16	5	150	10	1	2
25T	1	0	1	304	78	2	1	2	300	1	300	0	0	0	0	1	1	0	1	1	˂6	877	7.5	2.8	0.3	4.4	37.5	4.5	58	10.7	3.71	34.8	93.9	28.8	30.7	12.4	40.6	86	9.8	14.4	0.084	2	300	20	0
26T	1	1	1	125	69	2	5	5	96	1	96	0	0	0	0	1	0	0	1	8	12	1159	6.3	4.7	0.4	1.2	74.3	7.4	18.3	10.1	3.98	33.9	85.2	25.3	29.7	15.3	44.8	159	9.6	14.8	0.152	2	0	0	1	1
27T	1	1	1	196	70	2	3	5	36	1	36	0	0	0	0	0	0	0	1	1	˂6	840	4.6	1.9	0.3	2.4	40.7	6.1	53.2	11.1	4.29	36.7	85.5	25.8	30.2	13.6	40.6	249	8.8	14.4	0.219	1	0	0	1	1
28T	1	0	1	113	78	6	1	5	72	1	72	1	0	0	0	0	1	0	1	1	24	433	6.5	1.3	0.5	4.7	20.7	7.1	72.2	9.9	4.2	35.3	84.1	23.5	28	18.5	55.9	210	9.8	15	0.205	2	0	0	0
29T	1	1	1	363	55	2	13	7	72	1	72	0	0	0	0	0	0	0	1	1	24	307	5.1	0.7	0.2	4.2	13	5	82	12.1	4.42	39.5	89.5	27.3	30.6	12.7	41.7	255	9.2	14.6	0.235	2	0	0	0
30T	1	1	1	130	57	2	3	3	24	1	24	1	1	1	1	0	1	0	1	12	6	842	6.2	2.2	0.4	3.6	36.1	6.5	57.4	13	4.62	40.8	88.5	28.1	31.8	12.7	39.6	334	8.8	14.3	0.293	1	0	0	0
31T	1	1	1	216	75	2	3	5	108	1	84	1	1	0	1	1	1	1	1	3	˂6	904	4.9	2.4	0.5	2	47.8	10.9	41.3	12	4.71	40.7	86.5	25.4	29.4	13.6	14.7	186	10.9	15	0.202	2	20	10	1	4	R	S	S
32T	1	0	1	92	35	10	14	3	24	1	24	0	0	1	0	0	0	1	1	10	˂6	850	4.5	1.9	0.5	2.1	40.2	9.5	47.5	14.2	4.7	40.5	84.6	28.5	33.5	15.2	49.8	180	10.3	13	0.214	2	0	0	0
33T	1	1	1	83	41	2	2	2	72	1	72	0	0	0	0	0	0	1	1	12	˂6	1017	6.8	3.1	0.3	3.4	46.3	4.7	49	12	4.73	42.1	89.1	25.3	28.5	14.5	50.6	156	10.1	15.3	0.157	5	40	0	1	6
34T	1	1	1	140	60	6	1	3	144	1	72	1	0	1	0	0	1	0	1	11	˂6	581	3.6	1.6	0.3	1.7	44.7	7.2	48.1	12.2	4.54	39.7	87.6	26.8	30.7	12.9	40.6	133	10.3	15.2	0.136	1	0	0	0
35T	1	0	1	70	60	11	2	2	24	1	3	0	0	0	0	0	0	0	1	5	˂6	364	2.9	1	0.2	1.7	35.2	6.8	58	12.9	4.82	42.3	87.8	26.7	30.4	13.4	39.6	168	9.9	14.9	0.166	1	0	0	0
36T	1	0	1	311	61	2	1	11	96	1	96	1	0	0	0	0	0	0	1	3	˂6	536	3.2	1.4	0.03	1.5	42.9	9.6	47.5	13.2	4.76	43.2	90.8	27.7	30.5	13	42.7	186	9.2	14.7	0.171	1	0	0	0
37T	1	1	1	264	56	39	5	3	72	1	36	0	0	1	0	0	0	1	1	1	96	492	4.5	1.2	0.2	3.1	27.4	5.4	67.2	11.8	4.29	39.5	92.3	27.5	29.8	12.7	43.7	186	10	14.9	0.186	1	0	0	0
38T	1	1	2	120	67	2	5	3	0.25	1	0.25	1	0	0	0	0	0	0	0	11	˂6	418	3.4	1.3	0.3	1.8	37.6	9.8	52.6	11.1	4.04	39.9	99	27.4	27.8	14.8	56.9	292	10	14.7	0.292	1	20	0	1	4	R	S	I
39T	1	1	3	413	55	12	5	3	24	1	24	0	0	0	0	0	0	1	1	12	24	523	3.7	2	0.5	1.2	52.5	13.8	33.7	10.3	4.61	35.2	76.5	22.3	29.2	15.7	42.7	194	10.1	14.8	0.195	5	80	0	1	7
40T	1	1	1	78	69	5	5	5	120	1	120	0	0	0	0	1	0	1	1	8	˂6	931	5.6	2.5	0.4	2.7	44.2	7.3	48.5	11.1	5.1	37.2	73	21.7	29.8	16.5	41.7	394	9.4	14.8	0.37	1	0	0	1	6
41T	1	1	1	225	53	5	5	3	17	1	17	0	0	0	0	0	1	1	1	11	˂6	1007	5	2.7	0.4	1.9	54.3	8.2	37.5	13.2	5.21	43.2	83	25.3	30.5	14.7	42.7	188	11.1	14.8	0.208	1	200	0	1	3
42T	1	1	1	124	63	2	5	3	16	1	12	0	0	1	0	0	1	1	1	8	˂6	1245	5.7	3.1	0.5	2.1	53.9	8.8	37.3	13.3	4.54	42.6	93.9	29.9	31.2	13	43.7	216	8.7	14.4	0.187	1	0	0	1	6
43T	1	1	2	133	58	3	5	7	2	1	2	1	1	1	1	0	1	1	1	12	˂6	905	6.4	2.3	0.5	3.6	35.3	8.3	56.4	12	4.35	40.2	92.6	27.5	29.8	12.3	42.7	296	8.6	14.1	0.254	1	0	0	1	1
44T	1	0	1	98	65	5	5	3	48	1	48	0	0	1	0	0	0	0	1	12	˂6	805	7.2	3.4	0.6	3.2	47.8	8.3	43.9	12	3.95	38.3	97.1	30.3	31.3	12.8	43.7	277	9.1	14.7	0.252	1	100	0	0
45T	1	1	1	380	38	2	2	2	60	1	60	0	0	0	0	0	0	1	1	1	˂6	768	6.5	2.6	0.6	3.3	40.1	8.8	51.1	11.4	4.97	39.1	78.8	22.9	29.1	13.6	39.6	279	11.4	15	0.318	5	120	20	1	8
46T	1	1	1	91	55	2	2	3	24	1	24	1	0	1	0	1	1	1	1	4	˂6	1227	5.7	2.5	0.5	2.7	43.8	8.2	48	12.9	4.45	41.7	93.9	28.9	30.9	13.3	44.8	289	8.4	14.2	0.242	2	0	0	1	7
47T	1	1	4	117	48	2	3	2	96	1	96	0	0	0	0	0	1	0	1	8	96	946	11.2	2.2	0.7	8.3	19.3	6.7	74	12.1	5.14	39	76	23.5	31	14.2	38.6	452	9.9	14.7	0.447	5	100	20	1	2
48T	1	0	4	110	19	2	5	7	12	0	12	0	0	0	0	1	1	0	1	12	˂6	993	5.7	2.9	0.5	2.3	50.4	9.4	40.2	14.9	5.73	46.2	80.8	26	32.2	14.6	38.6	195	9.6	14.8	0.187	1	0	0	0
49T	1	1	1	320	49	2	3	3	1	1	1	0	0	1	0	0	0	1	0	5	48	688	6.1	2.5	0.5	3.1	40.5	9.3	50.2	13.2	5.44	44.1	81.1	24.2	29.9	14	38.6	177	10.6	14.9	0.187	2	160	20	0
50T	1	0	1	69	40	2	2	8	12	1	12	1	0	0	0	1	1	0	1	12	˂6	503	3.5	1.6	0.4	1.5	45.2	11	43.8	13.4	4.65	42.8	92.2	28.8	31.3	14.3	44.8	226	10	14.8	0.226	2	80	0	0
51T	1	0	1	87	55	13	5	3	240	0	240	0	0	0	0	0	0	0	1	4	˂6	435	2.3	0.7	0.2	1.4	31.1	7.6	61.3	19.4	6.41	61.7	96.4	30.2	31.4	13.5	45.7	82	9.8	14.7	0.08	1	0	0	0
52T	1	1	1	350	55	13	4	11	36	1	36	1	0	0	0	0	0	0	1	8	˂6	992	8	2.9	0.4	4.7	36.6	5.3	58.1	13.4	5.46	42.2	77.3	24.5	31.7	12.7	33.5	333	9.8	14.7	0.326	1	80	20	1	6
53T	1	0	1	232	47	2	15	3	0.5	1	0.5	1	0	1	0	0	1	0	1	4	˂6	1525	6.5	3.4	0.5	2.6	51.7	8.5	39.8	12.9	4.97	43.2	87	25.9	29.8	15.3	48.8	221	10	14.6	0.221	2	40	0	0
54T	1	0	1	137	65	2	16	9	120	1	84	1	0	0	0	0	1	1	1	3	˂6	464	3.7	1.7	0.2	1.8	46.5	5.2	48.3	11.8	4.08	37.9	92.9	28.9	31.1	13	41.7	118	10.1	15	0.119	2	0	0	0
55T	1	0	1	87	68	14	2	2	84	1	84	1	0	1	0	0	1	0	1	12	˂6	337	4.6	1.8	0.5	2.3	39.5	10.3	50.2	16.1	5.69	51.5	90.6	28.2	31.2	13.9	43.7	92	11.6	15.6	0.106	5	40	20	1	2
56T	1	1	1	156	70	15	3	3	24	1	24	1	0	0	0	0	0	0	1	11	˂6	994	4.1	2.3	0.4	1.4	55.2	9.7	35.1	12.3	4.33	40.3	93.3	28.4	30.5	13.5	43.7	160	9.8	14.8	0.156	2	0	0	1	4	R	R	R
57T	1	0	1	61	77	2	11	11	180	0	96	0	0	0	0	0	0	1	1	12	˂6	749	5.6	2.1	0.6	2.9	37.9	10.9	51.2	14.8	5.21	50.1	96.2	28.4	29.5	13.3	43.7	183	9.8	14.8	0.179	2	0	0	0
58T	1	0	1	90	75	2	17	2	24	1	24	1	0	0	0	1	1	0	1	12	˂6	614	6.4	3	0.7	2.7	46.9	10.4	42.7	12.4	5.21	41.8	80.3	23.8	29.6	14.2	41.7	267	9.2	14.7	0.245	5	20	0	1	3
59T	1	1	1	179	60	2	3	11	7	1	2	0	0	0	0	0	0	0	0	12	6	777	5.2	2.4	0.5	2.3	46.6	9.1	44.3	12.4	4.73	42.8	90.6	26.2	28.9	13	45.7	149	9.7	15	0.144	1	0	0	0
60T	1	0	4	87	15	8	18	7	2	0	2	1	0	0	0	0	0	0	0	1	˂6	491	4.9	2.4	0.5	2	48.7	10.1	41.2	11.3	4.1	37.1	90.6	27.5	30.4	14.6	46.7	168	9.9	14.6	0.166	5	40	0	0
61T	1	0	1	280	51	2	17	3	8	1	8	1	0	0	0	0	1	1	0	1	˂6	1679	4	2	0.4	1.6	49	10.8	40.2	14.8	5.17	47.7	92.3	28.6	31	13.2	42.7	174	10.7	14.9	0.186	5	0	200	0
62T	1	1	1	127	60	2	3	5	204	1	204	0	0	0	1	0	0	0	1	1	6	467	5.2	2.4	0.4	2.4	46	7.2	46.8	9.5	3.5	32.4	92.6	27.1	29.3	15.9	52.8	147	8.4	14.2	0.123	1	0	0	1	2
63T	1	1	1	180	55	2	3	5	24	1	24	1	0	0	0	0	1	1	1	2	12	583	9.2	2.9	0.7	5.6	31.5	7.8	60.7	10.5	4.38	35.3	80.6	23.9	29.7	14.3	40.6	141	11.4	15.1	0.16	1	0	0	1	1
64T	1	1	1	118	73	2	5	5	36	1	36	1	0	0	0	1	1	1	1	12	˂6	682	5.8	2.5	0.5	2.8	43.8	7.8	48.4	12.2	4.64	40.6	87.6	26.2	30	13.8	43.7	231	9.4	14.3	0.217	1	0	0	1	9
65T	1	0	1	310	46	2	19	1	1	1	0	1	1	0	1	0	0	1	0	8	˂6	1579	5	2.2	0.4	2.4	44.4	8	47.6	14.8	5.14	46.5	90.5	28.7	31.8	12.2	37.5	247	10	14.8	0.247	2	0	0	0
66T	1	0	1	197	80	2	20	5	84	1	36	1	1	0	1	0	1	0	1	12	˂6	1574	7.7	3.2	0.6	3.9	42.1	7.4	50.5	11.7	4.19	38.4	91.7	27.9	30.4	14.1	46.7	242	9.8	14.6	0.237	5	400	20	1	8
67T	1	1	1	290	53	39	5	3	36	1	30	1	1	0	1	0	1	1	1	8	˂6	678	3.8	1.6	0.3	1.9	41.8	8.8	49.4	13	5.18	42.5	82.2	25	30.5	13.8	39.6	142	10.1	14.8	0.143	1	20	0	0
68T	1	1	1	111	64	15	5	3	8	1	8	1	0	0	0	0	0	1	1	4	˂6	1591	5.5	2.9	0.4	2.2	52.3	7.8	39.9	12.4	4.51	44.5	98.8	27.4	27.8	14.5	56.9	160	10.3	15	0.164	5	400	0	0
69T	1	1	2	108	64	2	3	3	144	1	144	1	0	0	0	0	1	0	1	12	˂6	1013	7.7	2.9	0.6	4.2	37.3	8.4	54.3	12.8	5.41	44	81.5	23.6	29	13.8	41.7	340	10.5	14.7	0.357	1	0	0	0
70T	1	1	1	112	63	2	3	5	180	1	180	1	0	1	0	0	1	1	1	8	˂6	582	5	2	0.5	2.5	39.1	11.5	49.4	12.3	4.42	41.2	93.4	27.8	29.8	12.8	44.8	278	9	14.4	0.25	1	0	0	0
71T	1	1	1	95	70	5	5	5	168	1	168	1	1	1	0	0	1	0	1	6	˂6	664	5.2	2.6	0.3	2.3	49.8	6.5	43.7	13.7	4.87	44.1	90.7	28.1	31	13.2	43.7	177	10	14.6	0.177	5	40	0	1	3
72T	1	1	1	115	57	2	3	3	84	1	84	0	0	0	0	0	0	0	0	12	˂6	1442	5.3	2.8	0.4	2.1	53.2	8	38.8	12.4	4.62	41.3	89.4	26.8	30	13.8	44.8	316	8.8	14.3	0.278	2	0	0	0
74T	1	1	1	217	72	2	4	5	180	1	84	1	0	1	0	0	1	0	1	8	˂6	623	5.8	2.2	0.4	3.2	38.4	7.6	54	12	4.33	40.3	93.2	27.7	29.7	13.2	44.8	264	9.2	14.5	0.242	1	0	0	0
75T	1	0	1	191	65	2	1	3	300	1	48	1	0	0	0	0	1	0	1	4	˂6	749	3.9	2.2	0.5	1.2	56.8	11.9	31.3	13.3	4.67	44	94.3	28.4	30.2	14.6	49.8	193	10	14.7	0.193	1	0	0	1	3
76T	1	0	1	475	55	4	2	2	180	0	180	0	0	1	0	0	0	0	1	4	˂6	432	7.5	2	0.5	5	26.2	7.2	66.6	9.9	4.4	34.8	79.1	22.5	28.4	16.6	46.7	712	10.3	14.8		2	0	0	0
77T	1	0	1	119	65	2	4	5	60	0	60	1	0	0	0	0	1	0	1	12	˂6	742	4.5	2.5	0.5	1.5	56.4	10.6	33	13.8	5.19	45.8	88.4	26.5	30.1	14.5	44.8	142	10.9	15	0.154	2	0	0	0
78T	1	1	1	113	54	2	3	3	120	0	120	0	0	1	0	0	0	0	1	8	˂6	544	4.4	1.7	0.3	2.4	38.9	6.9	54.2	12.4	4.66	40.5	87.1	26.6	30.6	14.1	41.7	215	9.6	14.7	0.206	2	0	0	0
79T	1	1	1	210	54	2	3	3	48	1	48	1	1	1	1	0	1	1	1	12	12	652	4	1.8	0.2	2.6	40.2	7.4	50.2	10.6	4.5	41.6	80.6	28.5	30.5	13	40.5	210	9.2	14.2	0.19	5	60	200	1	4	R	S	R
80T	1	1	2	140	80	4	5	5	0.5	1	0.5	0	0	0	0	0	0	0	0	1	24	957	11.7	2.2	0.9	8.6	18.6	7.8	73.6	6.9	2.58	24.7	96.1	26.7	27.9	16.3	58.9	364	9.1	14.4	0.33	1	0	0	0
81T	1	1	1	325	60	2	9	1	0.25	1	0.25	1	0	0	0	0	1	1	0	7	12	519	3.4	1.2	0.3	1.9	36.2	7.6	56.2	9.3	3.42	31.3	91.8	27.1	29.7	12.7	41.7	76	11.8	15	0.089	2	0	0	0
82T	1	0	1	135	60	16	21	3	2	1	2	1	0	0	0	0	0	0	1	12	96	1001	10.7	3.4	1.3	6	32	12.3	55.7	11.4	4.49	39.2	87.4	25.3	29	15.3	49.8	145	10.7	15.1	0.155	1	0	0	1	10
83T	1	0	1	396	59	17	22	2	0.1	1	0.1	1	0	0	0	0	1	0	0	1	96	789	8.7	3	0.9	4.8	34.7	10.2	55.1	10.5	4.07	33.9	83.3	25.7	30.9	14.8	42.7	363	9.4	14.5	0.341	1	0	0	1	3
84T	1	0	1	205	63	15	1	8	36	1	36	0	0	0	0	0	1	0	1	1	˂6	518	3.2	1.2	0.2	1.8	36.4	8.8	54.8	14.4	5.58	48.8	87.5	25.8	29.5	14	43.7	164	10.2	14.6	0.167	5	0	0	1	4	R	S	S
85T	1	1	1	164	52	2	4	1	156	0	156	0	0	0	0	0	0	0	1	12	˂6	890	6.3	1.9	0.4	4	30.2	6.6	63.2	12.2	4.24	41.9	98.9	28.7	29.1	12.9	52.8	357	9.5	14.3	0.339	5	0	0	1	4	S	S	R
86T	1	1	1	296	66	1	5	5	96	1	96	0	0	0	0	0	0	0	1	12	48	1417	5.9	3.1	0.6	1.9	55.4	11.4	33.2	15.4	5.67	52.1	91.9	27.1	29.5	13.4	43.7	61	10.7	15.3	0.065	1	0	0	0
87T	1	0	1	113	49	2	22	2	2	0	0.5	0	0	0	0	1	0	0	0	12	˂6	547	3.9	1.5	0.3	2.1	37.3	9.7	53	12.4	4.5	40.9	90.9	27.5	30.3	13.2	45.7	250	12.1	15.4	0.302	1	0	0	0
88T	1	1	2	81	73	2	5	5	72	1	72	0	0	0	0	0	0	0	1	12	˂6	912	6.2	3.3	0.5	2.4	53.4	8.5	38.1	13.4	5.04	45.8	90.9	26.5	29.2	14.1	46.7	136	11.2	14.9	0.152	1	0	0	0
89T	1	1	1	275	60	2	1	11	120	1	120	0	0	0	0	1	0	1	1	1	12	721	5.4	3	0.6	1.8	56.2	10.9	32.9	14.9	5.71	49.8	87.3	26	29.9	14.7	44.8	259	11.1	14.8	0.287	1	0	0	0
90T	1	0	1	185	60	2	1	8	12	1	12	0	0	0	0	0	0	0	1	5	12	613	4.8	2	0.6	2.2	41.5	11.9	46.6	12.9	5.05	44.1	87.5	25.5	29.2	13.4	42.7	235	10.4	14.9	0.244	1	0	0	0
91T	1	0	1	95	63	10	1	11	204	1	204	0	0	0	0	0	0	0	1	1	˂6	488	3	1.1	0.4	1.5	37.1	12	50.9	13.5	4.97	45.3	91.2	27.1	29.8	13.4	44.8	244	9.5	14.5	0.231	1	0	0	0
92T	1	0	1	254	61	4	23	2	60	1	60	0	0	0	0	0	1	0	1	6	˂6	1213	6	3.3	0.5	2.2	53.5	9.1	37.4	13.5	5.19	45.6	87.9	26	29.6	12.6	39.6	204	10.6	15	0.216	1	0	0	0
93T	1	0	1	300	62	2	1	2	120	1	6	0	0	0	0	0	1	0	0	12	˂6	893	4	1.6	0.4	2	39	11	50	14.4	5.74	49.5	86.3	25	29	14	43.7	159	10.6	14.9	0.168	1	0	0	0
94T	1	0	1	202	50	18	4	1	132	1	72	0	0	0	0	0	1	0	1	6	˂6	721	4.3	2.2	0.5	1.6	51.2	11	37.8	14.2	5.66	49.2	87	25	28.8	13	43.7	181	10.1	14.8	0.182	1	0	0	0
95T	1	0	1	202	40	2	2	8	24	0	24	0	0	0	0	0	1	0	1	6	˂6	617	3.6	1.6	0.3	1.7	43.6	8.5	47.9	14.6	5.59	48.3	86.5	26.1	30.2	13	43.7	220	11.1	14.9	0.244	3	0	0	0
96T	1	1	1	138	53	2	5	3	48	1	48	0	0	0	0	0	0	0	1	12	˂6	456	4.4	1.5	0.4	2.5	33	10.3	56.7	12.2	4.76	40.8	85.8	25.6	29.9	14.3	43.7	231	10.3	14.6	0.237	1	0	0	0
97T	1	1	1	119	30	2	4	1	1	0	1	0	0	0	0	0	0	1	1	12	˂6	512	4.2	1.3	0.4	2.5	31.8	9.1	59.1	10.7	4.03	36.5	90.6	26.5	29.3	13.4	42.7	199	10.3	14.6	0.204	1	0	0	0
98T	1	1	1	191	52	2	3	3	432	0	432	0	0	0	0	0	1	1	0	6	12	750	6.1	2.5	0.5	3.1	40.5	7.9	51.6	12.6	4.78	43.1	90.3	26.3	29.2	13.4	47.9	278	10.1	14.8	0.28	1	0	0	0
99T	1	1	2	228	65	2	3	3	180	0	180	0	0	0	0	0	0	1	1	11	˂6	688	4.2	1.9	0.3	2	44.5	8.4	47.1	11.2	4.34	36.9	85.2	25.8	30.3	13	42.7	295	10.2	14.6	0.3	2	0	0	0
100T	1	1	1	210	53	17	4	1	24	1	24	0	0	0	0	0	0	1	1	12	˂6	1310	5.6	3	0.5	2.1	53.6	8.4	38	12.9	4.54	43.4	95.6	28.4	29.7	12.3	44.8	199	9.3	14.4	0.185	1	0	0	0
101T	1	0	1	245	70	8	1	5	24	1	24	0	1	0	0	0	1	0	1	6	96	477	7.4	1.3	0.5	5.6	18.2	6.1	75.7	10.1	3.98	35.3	88.9	25.3	28.6	15.7	51.9	423	8	14	0.338	2	0	0	0
102T	1	0	1	135	73	2	1	9	48	1	48	0	0	0	0	0	0	0	1	12	˂6	990	3.6	1.9	0.4	1.3	51.7	11.4	36.9	13.4	4.65	45.1	97	28.8	29.7	13.3	46.7	227	9.4	14.5	0.213	1	0	0	0
103T	1	1	1	97	66	2	3	3	24	1	24	0	0	0	0	0	0	1	1	1	96	918	8.2	2.6	0.8	4.8	31.5	10.5	58	10.6	3.99	37.2	93.3	26.5	28.4	14	49.8	151	11.9	15.2	0.179	2	0	0	0
104T	1	1	1	200	54	2	24	1	120	1	120	0	1	0	0	0	1	1	1	1	˂6	1326	4.8	2.3	0.3	2.2	47.5	6.7	45.8	12.6	4.64	41.2	88.8	27.1	30.5	12.2	39.6	133	12.6	15.5	0.167	1	0	0	0
105T	1	0	1	175	71	7	1	1	12	1	12	1	0	0	0	0	1	0	1	3	˂6	780	4.8	2	0.4	2.4	41.4	9	49.6	12.5	4.44	40.3	90.9	28.1	31	12.8	40.6	148	9.5	14.7	0.14	1	0	0	0
106T	1	1	2	193	57	2	4	3	12	1	12	0	1	0	0	0	0	1	1	1	48	777	6.4	2.6	0.6	3.2	40	9.9	50.1	13	4.88	44.4	91.1	26.6	29.2	13.2	44.8	180	11.5	14.9	0.207	5	0	0	0
107T	1	1	2	304	63	2	3	5	180	1	180	0	1	0	0	0	0	0	1	1	96	786	5.3	1.9	0.6	2.8	35.6	11.2	53.2	11.7	4.46	38.6	86.7	26.2	30.3	13	40.6	218	9.8	15	0.213	5	0	0	1	4	R	R	S
108T	1	1	2	202	64	4	5	5	120	1	120	0	0	0	0	1	1	0	1	1	12	513	4.1	1.2	0.5	2.4	24.3	11.5	49.3	7.7	2.87	25.1	87.5	26.8	30.6	13.3	39.6	136	10.1	15.1	0.137	1	0	0	0
109T	1	0	4	187	27	35	12	11	17	0	17	0	0	0	0	0	0	0	1	3	48	851	4.3	1.8	0.5	2	42.5	11.4	46.1	12.8	4.66	43.3	93	27.4	29.5	15.1	49.8	136	10.1	14.8	0.137	1	0	0	0
110T	1	1	2	187	73	17	3	3	24	1	24	0	1	0	0	0	0	0	1	7	12	619	4.2	1.2	0.4	1.9	43	11	42.3	13.8	4.5	44	86.3	28.2	29.3	14.5	48.8	138	10.2	14.9	0.138	1	0	0	0
111T	1	1	2	203	60	4	5	3	36	1	36	0	0	0	0	0	0	0	1	1	˂6	714	4.3	2.1	0.4	1.8	49.7	8.5	41.8	12.8	5.09	46.1	90.7	25.1	27.7	14.1	51.9	241	10.5	14.8	0.253	1	0	0	0
112T	1	0	1	102	52	4	22	3	216	1	216	1	0	0	0	0	1	0	1	1	˂6	512	4.6	2.2	0.4	2	48.2	8.2	43.6	15	5.73	49.6	86.6	26.1	30.2	12.7	41.7	196	10.4	14.9	0.203	1	0	0	0
113T	1	1	1	206	54	4	3	3	2	1	2	0	0	0	0	0	0	0	1	12	12	355	5.4	2	0.4	3	37.3	6.5	56.2	12.1	4.15	39.9	96.2	29.1	30.3	12.4	42.7	315	10.3	14.5	0.324	2	0	0	1	6
114T	1	1	1	156	58	18	3	3	36	1	36	1	0	1	0	0	1	0	0	6	48	612	4.4	1.5	0.4	2.5	35	8	57	12.9	4.73	42.7	90.3	27.2	30.2	13	40.6	254	10.3	14.6	0.261	1	0	0	1	3
115T	1	0	1	168	57	15	23	2	132	1	132	0	0	0	0	0	0	0	1	6	˂6	679	5.1	2.7	0.4	2	52.3	8.9	38.8	12.5	4.71	41.4	88.1	26.5	30.1	12.9	40.6	213	9.6	14.7	0.204	1	0	0	0
116T	1	0	1	207	70	19	25	10	288	1	288	1	0	0	0	0	1	0	1	3	˂6	412	2.7	1.4	0.3	1	50	12	38	13.4	5.03	46.8	93.2	26.6	28.6	13.9	50.9	193	10.2	14.9	0.196	2	0	0	0
117T	1	1	2	130	64	2	1	8	192	1	192	1	0	0	0	0	1	1	1	1	˂6	896	5	1.8	0.5	2.7	36.9	9.2	53.9	10.5	4.5	36.4	81	23.3	28.8	13	39.6	204	9.8	14.5	0.199	1	0	0	0
118T	1	1	1	209	52	20	5	3	12	1	12	1	0	0	1	0	1	1	1	1	12	1213	7.1	3.4	0.7	3	47.3	10.1	42.6	12.6	5.37	43.2	80.6	23.4	29.1	13.6	40.6	228	11.3	15.1	0.257	3	0	0	0
119T	1	1	1	260	60	2	1	1	120	1	120	0	0	0	0	1	1	1	1	4	˂6	1019	5.2	3.8	0.3	1.1	73.2	6.6	20.2	12.2	4.73	40.8	86.3	25.7	29.9	12.7	38.6	132	11.3	15.4	0.149	2	0	0	0
120T	1	1	1	79	61	2	3	3	12	1	12	1	0	0	0	0	1	0	1	12	˂6	877	4.6	1.9	0.4	2.3	42.1	9.6	48.3	12.4	4.49	42.3	94.4	27.6	29.3	14.5	55.9	279	10.3	14.5	0.287	1	0	0	0
121T	1	1	1	105	59	2	3	3	12	1	12	1	0	0	0	0	1	0	0	12	˂6	798	4.9	2.5	0.5	1.9	51.9	9.3	38.8	10	4.04	35.5	87.9	24.7	28.1	16.6	52.8	308	9.2	14.2	0.283	1	0	0	0
122T	1	1	1	296	41	13	9	1	24	1	24	0	0	0	0	0	0	0	0	12	˂6	863	6	2.8	0.4	2.8	45.9	7.2	46.9	14.1	5.32	46.8	88.1	26.5	30.1	12.6	39.6	316	9.9	14.7	0.312	1	0	0	0
123T	1	1	1	160	65	2	5	3	60	1	60	0	0	0	0	0	0	0	1	6	48	1123	6.3	1.8	0.5	4	28.7	8.5	62.8	12	4.35	39.9	91.8	27.5	30	11.5	38.6	457	8.8	14.4	0.402	1	0	0	1	2
123T '	1	1	1	160	65	2	5	3	60	1	60	0	0	0	0	0	0	0	1	6	48	934	6.3	1.8	0.5	4	28.7	8.5	62.8	12	4.35	39.9	91.8	27.5	30	11.5	38.6	457	8.8	14.4	0.402	1	0	0	1	4	R	R	R
124T	1	0	1	135	71	2	26	3	48	1	48	0	0	0	0	0	0	0	0	6	˂6	815	5.6	2.3	0.4	2.9	40.6	7.9	51.5	14.6	5.31	48.7	91.8	27.4	29.9	14.1	44.8	204	9.3	14.5	0.189	1	0	0	0
125T	1	0	1	242	67	4	1	2	168	1	168	1	0	0	0	0	0	0	1	5	192	472	3.3	0.9	0.3	2.1	28.6	8.9	62.5	9.6	2.92	34.1	116.9	32.8	28.1	17.7	77.3	94	10	14.8	0.094	2	0	0	1	3
126T	1	0	1	145	56	2	2	8	60	1	60	1	0	0	0	0	0	0	0	12	˂6	963	6.1	2.5	0.4	3.2	41	5.9	53.1	14.6	5.18	48.5	93.7	28.1	30.1	12.4	41.7	141	11.5	15.3	0.162	1	0	0	0
127T	1	0	1	326	64	21	1	3	60	1	60	0	0	0	0	0	0	0	1	6	˂6	647	4	1.8	0.4	1.8	43.8	10.5	45.7	11.8	4.72	39.8	84.5	25	29.6	14.8	44.8	248	9.4	14.5	0.233	1	0	0	0
128T	1	1	1	174	62	2	3	3	48	1	48	1	0	0	0	0	0	0	1	12	6	913	5.3	2.4	0.4	2.5	45.5	7.1	47.4	12	4.46	39.8	89.3	26.9	30.1	12.7	41.7	131	11.6	15	0.151	1	0	0	0
129T	1	0	1	147	60	2	4	1	3	0	3	1	0	0	0	0	1	0	0	12	˂6	636	2.8	1.4	0.3	1.1	50.5	9.7	39.8	11.1	4.5	37	82.3	24.6	30	15.3	43.7	169	9.6	14.8	0.162	1	0	0	0
130 T	1	1	3	136	57	2	4	1	1	0	1	0	0	0	0	0	0	0	1	11	48	899	4.5	2.3	0.3	1.9	50.4	8.3	41.3	14.2	5.4	47.6	88.2	26.2	29.8	13.3	42.7	227	10.1	15	0.229	2	0	0	1	2
131T	1	1	4	215	15	22	18	1	60	0	60	0	0	0	0	0	1	0	1	12	96	710	5.1	2.4	0.5	2.2	46.9	9.7	43.4	12.9	5.66	41.3	73.1	22.7	31.2	13.3	33.5	147	11	15.1	0.161	1	0	0	0
132T	1	0	1	150	46	23	27	2	216	1	216	1	0	0	0	0	1	0	1	6	192	818	7.6	2.1	0.6	4.9	27.2	8.8	64	7.9	3.53	27.9	79.2	22.3	28.3	15.5	44.8	342	7.9	14.1	0.27	1	0	0	1	6
133T	1	1	2	91	60	1	2	1	120	1	120	1	0	0	1	0	1	1	1	12	˂6	613	3.8	1.5	0.4	1.2	51.5	9.9	38.8	12.1	5.5	47	83.3	24.6	30	15.3	43.7	168	9.7	14.9	0.162	1	0	0	0
134T	1	1	1	89	68	22	3	3	24	1	24	1	0	0	0	0	1	0	1	12	6	702	5.4	2.7	0.6	2.1	48.4	12	39.6	13.3	5.21	45.9	88.1	25.5	28.9	12.9	45.7	271	9.3	14.6	0.252	1	0	0	1	3
135T	1	1	1	110	62	24	1	3	24	1	24	0	0	0	1	0	1	1	0	1	˂6	586	4.6	2.3	0.6	1.7	50.2	12.8	37	13.7	5.4	46.1	85.5	25.3	29.7	13.3	41.7	226	10.7	14.6	0.241	1	0	0	0
136T	1	1	2	344	70	2	3	5	192	1	192	0	0	0	0	0	0	0	1	1	24	1170	11.3	5.3	1.2	4.8	47.2	10.3	42.5	11.2	4.44	36.4	82	25.2	30.7	13.4	40.6	432	9.8	14.5	0.423	2	0	0	1	2
137T	1	1	2	260	60	6	3	3	96	1	96	1	0	0	0	0	1	1	1	1	˂6	987	5.5	3.4	0.5	1.6	61	9.3	29.7	12.9	5.04	43	85.4	25.5	30	13.6	44.8	278	9.7	14.7	0.269	1	0	0	0
138T	1	1	2	140	57	4	3	1	29	1	29	0	0	0	0	0	0	1	1	12	48	814	5.9	2.5	0.4	3	41.9	6.5	51.6	12.4	5.14	43.2	84.1	24.1	28.7	13.5	43.7	269	9	14.3	0.242	1	0	0	1	3
139T	1	1	2	98	73	2	1	1	1	1	1	0	0	0	0	0	0	1	1	1	48	516	6.7	2	0.6	4.1	29.5	8.9	61.6	11.1	5.03	38.3	76.2	22	28.9	17.7	48.8	261	11	15.1	0.287	3	0	0	0
140T	1	1	1	250	69	6	5	5	36	1	36	0	1	0	0	0	0	0	1	12	˂6	512	3.4	1.6	0.4	1.4	46.8	11	42.2	11.7	4.33	40.3	93.1	27	29	13.9	50.9	141	10.5	14.9	0.148	1	0	0	0
141T	1	0	1	121	58	2	4	3	192	1	192	0	0	0	0	0	0	0	1	12	˂6	465	3.4	1.6	0.3	1.5	46.4	10.2	43.4	15.7	5.57	52.4	94.2	28.1	29.9	12.2	40.6	202	10.6	15	0.214	2	0	0	0
142T	1	0	1	120	64	4	1	1	1	1	1	0	0	0	0	0	0	0	1	3	6	666	5.7	2.5	0.5	2.7	43.9	9.4	46.7	13.6	5.17	44.6	86.4	26.3	30.4	13	39.6	245	10	14.7	0.245	1	0	0	0
143T	1	0	1	59	57	2	1	8	6	1	6	1	0	0	0	0	1	0	1	5	6	820	3.9	2.1	0.4	1.4	53	10.1	36.9	14.2	5.54	47.9	86.5	25.6	29.6	14	44.8	237	9.2	14.6	0.218	2	0	0	0
144T	1	0	1	130	88	2	1	1	12	1	12	1	0	0	0	0	1	0	1	1	48	512	20.4	1.3	0.5	18.6	6.3	2.7	91	9.6	3.65	33.5	92	26.3	28.6	13	46.7	368	9.4	14.7	0.345	5	0	0	0
145T	1	1	1	152	45	2	3	1	0.13	0	0.13	1	0	0	0	0	1	0	0	12	96	399	5.1	0.5	0.2	4.4	10.6	4.6	84.8	10.5	4.3	35.2	81.9	24.4	29.8	12.8	37.5	186	9	14.5	0.167	5	0	0	0
146T	1	1	2	190	55	2	3	3	60	1	60	0	0	0	0	0	0	0	1	3	6	877	5.7	2.4	0.5	2.8	41.5	8.7	49.8	13.6	5.07	46.5	91.9	26.8	29.2	14.3	50.9	358	9.7	14.6	0.347	1	0	0	1	10
147T	1	1	1	162	62	2	1	11	120	1	120	1	0	0	0	0	0	1	1	8	12	845	6.3	3.2	0.5	2.6	50.7	8.2	41.1	12.9	4.95	43.9	88.8	26	29.3	13.9	46.7	315	10.2	14.7	0.321	1	0	0	0
148T	1	0	1	156	76	2	14	3	216	1	216	0	0	0	0	0	0	0	1	1	˂6	863	5.1	2.2	0.4	2.5	43.5	8.4	48.1	13.8	4.87	45.4	93.4	28.3	30.3	13	42.7	233	10.2	14.4	0.237	1	0	0	0
149T	1	1	2	210	86	6	3	5	240	1	240	0	0	0	0	0	0	1	1	1	12	777	6.8	2.8	0.6	3.4	41.4	8.3	50.3	14.2	5.21	49.1	84.3	27.2	28.9	14.2	50.9	290	11.1	15.1	0.321	1	0	0	0
150T	1	1	1	180	55	2	3	3	24	1	24	1	0	0	0	0	1	1	1	1	48	412	5.6	2.6	0.5	2.5	45.5	9.2	45.3	11.8	4.64	38.4	82.9	25.4	30.7	14.8	41.7	190	9.7	14.4	0.184	2	0	0	1	4	R	R	R
151T	1	1	2	140	64	2	1	8	192	1	192	1	0	0	0	0	1	0	0	1	˂6	868	4.6	1.7	0.4	2.5	36.3	9.5	54.2	10.6	4.46	36.1	81	23.7	29.3	13	40.6	179	10.1	14.7	0.18	1	0	0	0
152T	1	1	1	166	55	2	3	3	12	1	12	0	0	0	0	0	0	1	0	1	48	812	8	2.5	0.4	5.1	31.4	5.6	63	13	4.77	44.2	92.8	27.2	29.4	13	50.9	164	11.5	15.1	0.188	1	0	0	0
153T	1	1	2	235	67	1	3	5	120	1	120	1	0	0	0	0	0	1	1	3	˂6	992	6	1.9	0.5	3.6	32	8.4	59.6	13.3	4.97	45	90.6	26.7	29.5	15.5	49.8	275	11	14.7	0.302	1	0	0	0
154T	1	0	1	184	74	10	1	1	180	1	180	0	0	0	0	0	0	0	1	12	12	1239	7.7	2.8	0.6	4.3	36.9	7.2	55.9	12.6	4.94	45	91.2	25.5	28	12.8	50.9	181	10.7	14.9	0.193	2	0	0	1	10
155T	1	0	1	197	64	7	1	1	180	1	180	0	0	0	0	0	1	0	1	3	6	794	4.2	2.2	0.4	1.6	32.9	8.9	38.2	12.2	4.5	39.3	87.4	27.1	31	12.6	38.6	225	9.4	14.4	0.211	1	0	0	0
156T	1	1	1	158	70	2	4	5	60	1	60	1	0	0	0	0	1	1	1	12	48	614	6.5	2	0.7	3.8	30.3	10.5	59.2	12.6	5.27	43	81.6	23.9	29.3	13.4	42.7	259	10	14.8	0.259	1	0	0	0
157T	1	1	3	140	48	2	28	3	120	0	120	1	0	0	0	0	1	0	1	12	12	720	12.3	2	0.6	9.7	16.6	5.1	78.3	8.4	3.63	29.7	81.9	23.1	28.2	15.9	47.9	452	8.9	14.7	0.402	1	0	0	0
158T	1	1	1	180	68	15	3	1	60	1	60	0	1	0	0	0	0	1	1	12	˂6	725	6	2.5	0.6	2.9	41.1	10.3	48.6	14.4	5.22	48	92.1	27.5	30	12.7	46.7	269	9.6	14.4	0.258	2	0	0	0
159T	1	0	1	91	45	2	4	3	0.75	1	0.25	0	0	0	0	0	0	0	1	10	12	613	4.1	1.6	0.3	2.2	38.5	8.9	52.6	13.2	4.76	43.2	90.9	27.7	30.5	13.4	42.7	293	10.3	14.7	0.301	1	0	0	0
160T	1	0	1	102	71	15	1	1	3	1	0.75	0	0	0	1	0	0	1	0	7	˂6	1310	7.4	4	0.8	2.6	53.3	11.3	35.4	13.1	4.91	44	89.8	26.6	29.7	15.2	51.9	298	10.4	14.5	0.309	3	0	0	0
161T	1	0	1	128	68	25	1	2	60	1	60	1	0	0	0	0	1	0	1	1	12	951	5	2.3	0.5	2.2	45.1	10.2	44.7	11.2	4.1	36.5	89.1	27.3	30.6	15.7	51.9	198	9.3	14.5	0.184	1	0	0	0
162 T	1	1	1	94	65	26	1	2	24	1	24	1	0	0	0	0	1	1	1	9	12	724	4.8	1.9	0.6	2.3	40	11.7	48.3	14.1	5	47.2	94.4	28.2	29.8	13.6	48.8	151	10.4	14.8	0.157	1	0	0	0
163T	1	1	1	104	74	18	3	3	60	1	60	1	0	0	0	0	1	0	1	7	˂6	948	6.7	2.6	0.5	3.6	38.7	6.9	54.4	14.4	5.38	47.2	87.9	26.7	30.5	12.9	40.6	190	11	14.9	0.209	1	0	0	0
164T	1	1	4	95	23	27	18	1	60	0	60	1	0	0	0	0	1	0	1	1	48	820	4.6	2.2	0.4	2	47.6	7.9	44.5	13	4.9	42.3	86.5	26.5	30.7	12.7	40.6	306	9.5	14.6	0.29	2	0	0	1	4	R	R	S
165T	1	0	1	135	69	5	4	3	24	1	24	0	0	0	0	0	0	0	1	12	12	947	7.9	3.7	0.7	3.5	46	9.1	44.9	9.7	4.25	34.8	81.9	22.8	27.8	17.3	50.9	199	10.7	15.1	0.212	1	0	0	0
166T	1	1	1	140	58	2	2	2	36	1	36	1	0	0	0	0	1	1	1	12	48	879	7.1	3.4	0.8	3.3	48	9.1	44.6	9.8	4.5	36.2	80.23	23.6	28.9	17.6	50.1	198	10.6	14.2	0.301	2	0	0	1	4	R	R	S
167T	1	0	1	146	62	2	2	9	60	1	60	0	0	0	0	0	0	0	1	1	96	613	5.5	2	0.4	3.1	37.2	7.6	55.2	13.5	5.17	46	89	26.1	29.3	14.7	45.7	231	10.3	14.8	0.237	1	0	0	1	3
168T	1	1	1	157	58	28	3	3	108	1	108	1	0	0	0	0	1	0	1	5	12	819	6.1	3.7	0.5	1.9	60.2	9.4	30.4	9.4	3.37	31.5	93.6	27.8	29.8	13.8	45.7	143	10.6	15.1	0.151	1	0	0	0
169T	1	1	1	139	57	29	3	3	36	1	36	0	0	0	0	0	0	0	1	6	24	743	5.5	2.2	0.5	2.8	39.6	9.2	51.2	12.9	5.29	44.1	83.4	24.3	29.2	14.5	43.7	222	10.3	14.8	0.228	2	0	0	0
170T	1	0	1	168	70	2	14	3	36	1	36	1	0	0	0	0	0	0	1	6	12	872	3.9	1.9	0.3	1.7	48	8.8	43.2	12.6	5.04	45.3	90	25	27.8	15.4	52.8	244	10	14.6	0.244	1	0	0	0
171T	1	0	1	95	42	13	17	1	36	0	36	1	0	0	0	0	1	0	0	6	˂6	834	3.8	2	0.3	1.5	51.4	10.4	38.2	14	5.02	46.3	92.4	27.8	30.2	13.5	46.7	317	10.2	14.9	0.323	1	0	0	0
172T	1	0	1	180	70	30	14	3	132	1	132	1	0	0	0	0	1	0	1	1	12	725	7.3	1.5	0.5	5.3	20.9	6.8	72.3	11.5	4.43	39.4	89.1	25.9	29.1	13.6	45.7	223	9.6	14.5	0.214	2	0	0	0
173T	1	1	1	150	47	18	3	3	108	1	108	0	0	0	0	0	0	0	0	12	6	761	5.5	2.2	0.5	2.8	40.5	9.2	50.3	12.2	4.72	42.3	89.8	25.8	28.8	15.4	53.9	187	9.9	14.8	0.185	2	0	0	0
174T	1	1	1	280	70	2	3	3	84	1	84	1	0	0	0	0	1	1	1	7	˂6	1023	3.7	1.9	0.4	1.4	51.4	10.5	38.1	14.3	5.09	47.1	92.6	28	30.3	12.7	40.6	225	10.2	14.5	0.229	1	0	0	1	3
175T	1	0	1	220	45	15	17	2	120	1	120	1	0	0	0	0	1	0	1	3	96	871	7.4	3	0.7	3.7	40.5	10.1	49.4	14.2	5.04	47.1	93.5	28.1	30.1	11.6	39.6	168	9.9	14.7	0.166	1	0	0	0
176T	1	1	4	180	23	9	37	8	24	0	24	0	0	0	0	0	0	0	0	12	48	924	6.7	3.6	0.8	2.3	53.7	11.5	34.8	13.3	4.8	45.5	94.9	27.7	29.2	14.2	55	279	10	14.5	0.279	1	0	0	1	1
177T	1	0	4	185	5	2	18	6	36	0	36	1	0	0	0	0	1	0	1	12	˂6	817	5.6	2	0.6	3	36.6	10.3	53.1	12	5.03	41.1	81.9	23.8	29.1	13.4	39.6	329	9.7	14.6	0.319	1	0	0	0
178T	1	1	1	165	60	2	22	3	60	1	60	1	0	0	0	0	1	0	1	12	˂6	884	5	1.6	0.5	2.9	32.7	10.3	57	10.8	3.88	36.3	93.8	27.8	29.7	13.3	47.9	367	9.1	14.6	0.33	2	0	0	0
179T	1	1	1	169	61	2	3	3	36	1	36	0	1	0	0	0	0	1	1	1	48	812	6.4	1.5	0.8	4.1	23.5	12.6	63.9	9.7	3.69	32.5	88.3	26.2	29.8	13.3	42.7	455	9.3	14.4	0.423	1	0	0	0
180T	1	0	1	170	57	50	5	3	132	1	132	1	0	0	0	0	1	0	1	12	192	910	10	2	0.7	7.3	20	7.5	72.5	9	4.03	30.7	76.4	22.3	29.3	15.1	40.6	333	9.4	14.8	0.313	1	0	0	0
181T	1	0	1	180	55	13	2	2	36	1	36	1	0	0	0	0	1	0	1	12	96	1287	14.1	2.4	0.6	11.1	16.8	4.7	78.5	7.7	2.94	29.5	100.4	26.1	26.1	19.8	69.1	125	9.9	15.1	0.123	3	0	0	1	6
182T	1	0	1	320	62	2	1	2	36	1	36	0	0	0	0	0	0	0	0	12	48	793	5.3	2.1	0.7	2.5	38.9	14.6	46.5	12	4.74	41.8	88.3	25.3	28.7	16.6	53.9	290	9.2	14.4	0.266	1	0	0	0
183T	1	1	1	187	60	2	1	1	180	1	180	1	0	0	0	0	1	0	1	12	24	603	5.7	2.1	0.4	3.2	36	8.7	55.3	12	4.45	40.8	91.7	26.9	29.4	13.5	42.7	225	11.2	15.1	0.252	1	0	0	0
184T	1	1	1	146	45	17	28	1	24	1	24	0	0	0	0	0	0	0	0	12	˂6	1546	8.1	3.5	0.8	3.8	43.8	10.1	46.1	12.9	5.02	42.8	85.4	25.6	30.1	14.9	43.7	296	12.1	15	0.358	1	0	0	0
185T	1	1	2	172	84	2	3	5	36	1	36	1	0	0	0	0	0	1	1	1	˂6	1314	6.4	3.2	0.6	2.6	49.3	10.5	40.2	12.5	5.17	42.8	82.9	24.1	29.2	13.5	41.7	334	10.5	14.6	0.35	1	0	0	0
186T	1	1	1	150	54	2	3	1	48	1	48	1	0	0	0	0	1	1	1	1	12	947	4.5	1.9	0.4	2.2	43	8.9	48.1	13.5	5.11	46.6	91.3	26.4	28.9	14.1	48.8	223	9.9	14.6	0.22	2	0	0	0
187T	1	1	1	123	48	45	3	3	12	1	12	0	0	0	0	0	0	1	1	1	48	919	6.7	3.3	0.6	2.8	48.9	9.7	41.4	12.8	4.93	44.3	90	25.9	28.8	13	42.7	152	11.1	14.9	0.168	1	0	0	0
188T	1	1	1	118	60	46	3	3	12	1	12	1	0	0	0	0	1	1	1	1	˂6	1147	8.4	3	0.8	4.6	35.5	9.2	55.3	11.5	5.35	41.8	78.2	21.4	27.5	16.1	48.8	191	11.9	14.9	0.227	1	0	0	0
189T	1	1	1	360	59	2	4	3	12	1	12	0	0	0	0	0	0	1	0	1	˂6	456	5.1	1.3	0.6	3.2	26	11.3	62.7	13.6	5.19	47.2	91.1	26.2	28.8	13.8	47.9	426	9.3	14.3	0.396	1	0	0	0
190T	1	0	1	129	45	2	4	1	120	0	120	0	0	0	0	0	0	0	1	8	˂6	388	3.1	1.1	0.2	1.8	35.8	7.5	56.7	15.5	5.89	50.9	86.5	26.3	30.4	13.3	38.6	177	9.6	14.9	0.169	1	0	0	0
191T	1	1	2	165	73	6	3	5	120	1	120	1	0	0	0	0	1	1	0	12	96	820	3.9	1.6	0.5	1.8	40.8	13.7	45.5	11.9	5.34	40.3	75.5	22.2	29.5	13.9	36.6	136	9.9	14.8	0.134	1	0	0	0
192T	1	0	1	156	73	2	1	2	1	1	1	0	0	0	0	0	0	0	0	12	12	719	3.8	1.6	0.4	1.8	41.9	10.4	47.7	12.1	4.98	42.3	85	24.2	28.6	13.3	43.7	267	9	14.7	0.24	1	0	0	0
193T	1	0	1	165	52	4	22	3	216	1	216	1	0	0	0	0	1	0	1	1	24	878	5.1	2.3	0.5	2.3	46	9.4	44.6	14.9	5.64	48.6	86.3	26.4	30.6	12.7	39.6	198	10.6	14.8	0.209	1	0	0	0
194T	1	0	1	160	70	25	1	2	60	1	60	0	1	0	0	0	0	0	1	12	12	781	3.5	1.5	0.3	1.7	43.7	8.6	47.7	12.5	4.93	44.8	90.9	25.3	27.9	14.9	51.9	272	9.1	14.1	0.247	1	0	0	0
195T	1	1	2	156	73	15	3	5	324	1	12	1	0	0	0	0	1	1	0	1	48	914	4	1.6	0.3	2.1	39.7	8.3	52	9.9	3.84	35	91.2	25.7	28.2	12.8	40.6	328	9.5	14.5	0.311	3	0	0	0
196T	1	0	4	93	30	18	4	7	48	0	48	0	0	0	0	0	0	0	0	3	˂6	870	3.6	1.6	0.2	1.8	43.3	6.4	50.3	12.2	5.1	43	84.4	23.9	28.3	13.9	43.7	222	9.6	14.4	0.213	1	0	0	0
197T	1	1	1	96	66	2	5	3	24	1	24	1	0	0	0	0	1	1	1	1	˂6	1314	7.3	3.7	0.9	2.7	50.4	12.4	37.2	11.3	4.34	37.9	87.4	26	29.8	13.8	45.7	308	10.2	14.6	0.314	1	0	0	0
198T	1	1	1	114	62	50	3	3	96	1	96	1	0	0	0	0	1	0	1	11	˂6	1208	7.5	3.5	0.7	3.3	47.1	8.9	44	11.8	4.82	41.8	86.8	24.4	28.2	13.8	42.7	303	9.9	14.7	0.299	1	0	0	0
199T	1	1	1	90	65	8	3	3	60	1	60	0	0	0	0	0	0	1	1	1	6	614	4.8	2.3	0.6	1.9	48.9	11.8	39.3	12.1	4.36	40.5	92.9	27.7	29.8	11.9	40.6	177	10.7	14.9	0.189	1	0	0	0
200T	1	1	2	129	82	2	3	5	84	1	84	1	0	0	0	0	1	1	1	12	96	816	3.2	1.8	0.4	1	57.2	11.1	31.7	11.4	4.26	38.8	91.1	26.7	29.3	13.8	48.8	213	8.5	14.5	0.181	1	0	0	0
201T	1	1	4	210	35	26	29	1	24	1	24	0	0	0	0	0	0	0	0	3	6	821	3.9	1.6	0.3	2	40.2	8.4	51.4	11.7	4.41	39.6	89.8	26.5	29.5	13	41.7	231	10.3	14.7	0.237	3	0	0	0
202T	1	1	1	103	56	2	2	11	36	1	36	1	0	0	0	0	1	1	1	1	˂6	719	6.6	2.8	0.5	3.3	42.1	8.4	49.5	10.6	4.11	36.6	89.2	25.7	28.9	14.2	46.7	305	10.3	14.8	0.314	1	0	0	0
203T	1	1	1	210	46	2	9	1	36	1	36	0	0	0	0	0	0	0	1	12	24	515	4.9	1.3	0.4	3.2	27.5	7.7	64.8	13.3	5.02	44.9	89.5	26.4	29.6	13.9	43.7	236	10.1	14.8	0.238	1	0	0	0
204T	1	1	1	223	55	13	30	4	24	1	24	1	0	0	0	0	1	0	1	1	48	741	5.9	2	0.4	3.5	33.7	6.6	59.7	12.9	5	44.5	89	25.8	28.9	12.7	40.6	345	8.9	14.3	0.307	1	0	0	0
205T	1	0	1	150	70	2	1	1	120	1	120	0	1	0	0	0	0	0	0	3	˂6	628	5.9	2.9	0.5	2.5	47.8	9.1	43.1	13.8	5.46	47.7	87.5	25.2	28.9	14.3	44.8	298	9.8	14.6	0.292	1	0	0	0
206T	1	0	1	140	76	2	1	5	216	1	216	0	1	0	0	0	1	0	1	9	˂6	613	5.4	1.8	0.5	3.1	33	8.7	58.3	13.5	4.8	45	93.9	28.1	30	12.4	41.7	287	9.7	14.7	0.278	1	0	0	0
207T	1	0	4	212	17	31	15	3	9	0	9	1	0	0	0	0	1	0	1	1	24	974	5.6	3.1	0.6	1.9	54.9	10.5	34.6	13.8	5.16	46.4	90.1	26.7	29.7	13.6	41.7	264	9.4	14.7	0.248	2	0	0	0
208T	1	0	1	145	79	2	1	5	2	1	2	1	0	0	0	0	0	0	0	6	˂6	847	5.2	3.4	0.4	1.4	65	8.6	26.4	9	3.28	31.4	95.9	27.4	28.6	15.2	55.9	124	10	15.1	0.124	2	0	0	0
209 T	1	1	1	183	69	6	3	5	36	1	12	1	0	0	0	0	1	1	1	12	˂6	789	5.7	2.3	0.5	2.9	40.2	8.2	51.6	12	4.94	40.4	81.9	24.2	29.7	13.4	37.5	240	9.5	14.8	0.228	3	0	0	1	2
210T	1	0	4	500	21	13	18	1	3	0	3	1	0	0	0	0	1	0	1	12	12	617	4.6	1.4	0.4	2.8	29.4	10.5	60.1	13.3	4.56	43	94.3	29.1	30.9	13.6	44.8	282	9.3	14.7	0.262	3	0	0	0
211T	1	1	1	196	56	12	4	2	24	1	24	1	0	0	0	0	0	1	1	6	48	812	8	2.9	0.8	4.3	36.7	9.5	53.8	11.5	4.61	41.4	89.9	24.9	27.7	12.6	43.7	363	11	14.6	0.399	1	0	0	0
212T	1	1	1	223	60	29	5	3	12	1	12	0	0	0	0	0	0	0	0	12	12	784	5.2	2.4	0.5	2.3	45.9	9.3	44.8	11.4	5.11	39.1	76.6	22.3	29.1	13.9	37.5	365	9.3	14.4	0.339	1	0	0	0
213T	1	1	1	221	55	5	3	3	36	1	36	1	0	0	0	0	1	1	1	1	12	589	4.8	2.3	0.3	2.2	47.7	5.9	46.4	11	4.39	38.2	87.2	25	28.7	13.8	43.7	241	9.2	14.4	0.221	3	0	0	0
214T	1	1	1	189	58	39	3	5	2	1	2	0	0	0	0	0	0	0	0	12	12	637	7.1	2.5	0.4	4.2	35	6.3	58.7	12.6	4.61	43.5	94.5	27.3	28.9	12.8	44.8	275	10.2	14.8	0.28	1	0	0	0
215T	1	0	1	175	59	2	30	4	48	0	48	0	1	0	0	0	0	0	1	12	12	874	6.7	2.1	0.5	4.1	31.6	8	60.4	12.6	4.93	44	89.3	25.5	28.6	13.6	46.7	258	9.5	14.8	0.245	1	0	0	0
216T	1	1	1	210	68	2	3	3	60	1	60	1	0	0	0	0	1	0	1	1	12	836	5.9	3.1	0.6	2.2	53.2	9.4	37.4	13.5	4.84	47.3	97.9	27.8	28.5	13.9	52.8	148	11.8	14.7	0.174	1	0	0	0
217T	1	0	1	230	60	4	14	4	96	1	96	0	0	0	0	0	0	1	1	3	24	618	5	2.2	0.5	2.3	43.9	11	45.1	12.9	5.06	45.2	89.4	25.4	28.5	13.6	45.7	255	9.8	14.8	0.249	1	0	0	0
218T	1	1	5	142	38	13	7	11	3	1	3	0	0	0	0	0	0	0	0	8	48	746	5.1	2.5	0.5	2.1	49.2	9	41.8	12.6	5.14	43.9	85.5	24.5	28.7	14	45.7	256	10.7	14.6	0.273	2	0	0	0
219T	1	1	1	186	54	2	3	3	3	1	3	1	0	0	0	0	1	1	0	1	12	821	4.9	2.4	0.3	2.2	47.9	6.6	45.5	12.6	4.75	43.2	91.1	26.5	29.1	13.2	48.8	248	9.5	14.3	0.235	3	0	0	0
220T	1	1	1	196	39	2	3	2	2	1	2	0	0	0	0	0	0	0	0	12	24	842	7.3	2.8	0.7	3.8	38.4	10.2	51.4	11.8	4.46	41.1	92.3	26.4	28.7	13.3	49.8	306	10.3	14.7	0.315	3	0	0	0
221T	1	1	1	210	57	4	24	8	24	1	24	0	0	0	0	0	0	1	1	12	12	701	5.1	1.5	0.7	2.9	29.9	13	57.1	13.1	5.46	45.8	84	23.9	28.6	13.9	46.7	269	9.6	14.4	0.258	1	0	0	0
222T	1	0	1	222	58	2	2	9	444	1	444	1	0	0	0	0	1	1	1	3	24	741	4.8	2.5	0.4	1.9	52.3	8.4	39.3	13.6	5.19	47.1	90.9	26.2	28.8	13.4	45.7	154	11.5	14.9	0.177	1	0	0	0
223T	1	0	1	131	52	2	24	3	168	1	168	0	0	0	0	0	0	1	1	9	96	837	2.8	1.2	0.2	1.4	44.6	7.2	48.2	10.3	4.16	16.5	87.9	24.7	28.2	16.6	51.9	256	10.3	14.9	0.263	1	0	0	0
224T	1	1	1	128	62	2	32	3	96	1	96	1	0	0	0	0	1	0	1	1	96	914	6.6	2.6	0.4	3.6	40.1	6.1	53.8	10.3	4.37	36.2	82.9	23.5	28.4	15.4	45.7	258	9.3	14.5	0.239	1	0	0	0
225T	1	1	1	230	31	2	4	3	144	1	144	0	0	0	0	0	0	0	1	1	48	619	5.4	1.9	0.4	3.1	35.3	6.8	57.9	9.5	3.73	34.1	91.5	25.4	27.8	14.1	49.8	255	9	14.3	0.229	1	0	0	0
226T	1	0	1	291	36	2	38	1	48	1	48	0	0	0	0	0	0	0	1	12	12	607	3.9	1.8	0.2	1.9	45.3	5.9	48.8	14.7	5.96	51.1	85.8	24.6	28.7	12.9	38.6	258	10	14.6	0.258	3	0	0	0
227T	1	0	1	149	63	2	1	1	96	1	96	1	0	0	0	0	1	1	1	12	˂6	514	7.8	2.4	0.3	5.1	30.2	4.5	65.3	12.9	4.32	43	99.7	29.8	30	12.9	45.7	231	8.9	14.4	0.205	3	0	0	0
228T	1	0	1	105	53	2	9	2	84	1	84	0	1	0	0	0	0	0	1	12	48	674	7	2.5	0.4	4.1	35.1	5.7	59.2	8.2	3.37	30.8	91.6	24.3	26.6	17.3	56.9	393	8.3	14.3	0.326	2	0	0	0
229T	1	1	1	203	60	2	3	1	60	1	60	1	0	0	0	0	1	0	1	12	12	763	4.4	1.9	0.4	2.1	42.3	9.9	47.8	9.5	3.83	33	86.4	24.8	28.7	13	37.5	194	10.1	15.2	0.195	1	0		1	8
230T	1	1	1	230	52	2	3	1	120	1	120	1	0	1	0	0	1	1	1	1	384	1087	13.2	2	0.6	10.6	15.5	4.2	80.3	6.4	2.57	22.1	86.1	24.9	28.9	14	45.7	388	8.4	14.4	0.325	2	0	0	0
231T	1	0	1	280	58	32	2	8	120	1	120	0	1	0	0	0	0	1	1	5	48	847	4.2	1.4	0.3	2.5	33.8	6.1	60.1	10.2	3.91	35.9	91.9	26	28.4	15.1	50.9	213	9.2	14.8	0.195	1	0	0	0
232T	1	0	1	102	41	33	4	1	24	1	24	0	0	0	0	0	0	0	0	11	24	816	4.7	2.1	0.3	2.3	45.4	7.4	47.2	14.1	5.5	48.2	87.7	25.6	29.2	14.3	44.8	305	8.5	14.2	0.259	3	0	0	0
233T	1	0	1	225	81	2	1	2	120	1	120	1	0	0	0	0	1	1	1	3	12	647	4.4	2	0.3	2.1	45.1	8.2	46.7	8.7	3.42	31.4	91.9	25.4	27.7	15.3	55.9	170	10.6	15.4	0.18	3	0	0	0
234T	1	0	4	154	28	9	17	2	1	1	1	0	0	0	0	0	0	0	0	5	192	914	4.6	1.6	0.3	2.7	35	7.4	57.6	11.7	4.54	41.4	91.3	25.7	28.2	15.2	49.8	192	9.4	14.6	0.18	1	0	0	0
235T	1	1	1	214	51	2	3	3	12	1	12	1	0	0	0	0	1	1	0	6	48	725	4.4	2.3	0.2	1.9	51.7	5.5	42.8	12.4	4.96	42.5	85.8	25	29.1	14	43.7	320	10	14.6	0.32	1	0	0	1	10
236T	1	1	1	199	63	12	3	1	144	1	144	1	0	0	0	0	1	0	1	6	48	1348	8	4.6	0.5	2.9	57.8	6.3	35.9	12.8	4.72	44.5	94.4	27.1	28.7	14.5	51.9	185	10.7	15	0.197	3	0	0	0
237T	1	1	1	182	63	2	1	2	132	1	132	0	0	0	0	0	0	1	1	1	24	1257	5.6	3	0.4	2.2	53.3	8	38.7	13	5.06	45.3	89.6	25.6	28.6	13.4	44.8	304	9.6	14.6	0.291	1	0	0	0
238T	1	0	1	106	54	34	35	4	120	1	120	0	0	0	0	0	0	1	1	1	48	610	3.5	2.1	0.4	1	60	11.5	28.5	13.1	5.08	43.9	86.5	25.7	29.8	13	41.7	153	9.6	14.7	0.146	1	0	0	0
239 T	1	0	1	81	63	6	31	11	48	1	48	0	0	0	0	0	0	0	1	12	24	589	3.6	1.3	0.2	2.1	35	7.3	57.7	14.2	4.94	48.6	98.4	28.7	29.2	13.9	48.8	213	10.2	14.7	0.217	3	0	0	1	2
240T	1	0	1	240	76	2	1	3	48	1	48	0	1	0	0	0	0	1	1	12	24	687	4.5	1.9	0.4	2.2	42.6	8.9	48.5	13.2	5.88	47.4	80.7	22.4	27.8	14.6	43.7	213	9.9	15	0.21	1	0	0	1	2
241T	1	1	1	181	60	33	1	3	120	1	120	0	0	0	0	0	0	0	1	1	12	917	5.1	2.3	0.3	2.5	44.8	5.7	49.5	12.5	4.95	42	84.9	25.2	29.7	13.3	41.7	255	9.4	14.5	0.239	3	0	0	0
242T	1	1	1	210	64	33	1	4	36	1	36	1	0	0	0	0	1	0	0	5	48	824	5	2.1	0.8	2.1	41.1	17.2	41.7	13.2	4.74	45.7	96.5	27.8	28.8	14.7	51.9	233	10.2	15	0.237	1	0	0	0
243T	1	1	1	220	58	35	3	2	12	1	12	0	0	0	0	0	1	0	0	12	48	963	5.4	3	0.4	2	56.4	6.5	37.1	11.5	4.45	39.7	89.4	25.8	28.9	13.6	40.6	265	9.8	14.6	0.259	1	0	0	0
244T	1	0	1	236	66	33	1	4	12	1	12	0	0	0	0	0	1	0	1	3	6	718	4.9	1.9	0.3	2.7	38.8	6.9	54.3	12.8	5.08	45.5	89.6	25.1	28.1	14.2	48.8	287	10	14.6	0.287	1	0	0	0
245T	1	1	1	120	52	2	4	3	24	1	24	0	0	0	0	0	1	1	1	1	6	713	5.2	2.9	0.3	2	54.9	7.1	38	11.4	4.45	40.3	90.7	25.6	28.2	14.9	55.9	310	10.4	14.6	0.322	1	0	0	0
246T	1	1	1	146	70	2	3	3	120	1	120	1	0	0	0	0	0	1	1	1	24	861	6	2.9	0.4	2.7	48.8	6.3	44.9	13.9	4.45	49.5	91	25.5	28	14.6	49.8	264	10.3	14.9	0.271	1	0	0	0
247T	1	1	4	211	49	2	4	11	228	1	228	1	0	0	0	0	1	1	1	1	48	743	4.2	1.6	0.4	2.2	39.2	8.5	52.3	11	4.79	38.8	81.2	22.9	28.3	14.7	44.8	272	10.3	15.1	0.28	3	0	0	0
248T	1	1	1	153	40	2	3	1	72	1	72	0	1	0	0	0	0	1	1	1	24	479	3.6	2	0.2	1.4	54.2	8	37.8	11.5	4.06	40	98.7	28.3	28.7	13.8	45.7	245	9.7	14.9	0.237	5	0	0	0
249T	1	0	1	160	58	36	17	11	180	1	180	0	0	0	0	0	0	0	1	10	˂6	647	4.3	1.7	0.3	2.3	40.6	7.3	52.1	8.7	3.68	83.9	23.6	28.2	15.5	47.9	48.9	337	8.5	14.3	0.286	1	0	0	0
250T	1	1	1	107	45	21	32	2	84	1	84	0	0	0	0	0	0	0	0	11	12	691	4.9	1.8	0.3	2.8	37	6.5	56.5	14	5.22	48.1	92.3	26.8	29.1	14.5	47.9	247	9	14.6	0.222	1	0	0	0
251T	1	1	1	123	64	2	3	11	24	1	24	0	0	0	0	0	0	0	0	1	48	796	5.6	2.3	0.3	3	40.2	5.8	54	13	4.71	44.4	94.3	27.6	29.2	13.2	50.9	300	11.1	14.6	0.333	3	0	0	0
252T	1	1	1	115	66	2	3	3	36	1	36	1	0	0	0	0	1	0	1	9	48	814	3.8	2	0.3	1.5	51.3	8.9	39.8	12.2	4.22	41.9	99.3	28.9	29.1	12.9	50.9	168	10.6	15.1	0.178	1	0	0	0
253T	1	1	2	236	67	2	3	6	192	1	192	0	0	0	0	0	0	0	1	1	24	817	4.8	2.3	0.2	2.3	47.1	6	46.9	10.5	3.89	35.7	91.9	26.9	29.4	14.3	48.8	190	10.4	14.9	0.197	1	0	0	0
254T	1	1	1	150	58	2	4	1	0.25	1	0	1	0	0	0	0	1	0	0	5	6	623	4.3	1.9	0.3	2.1	45.3	6.8	47.9	12.9	4.94	42.7	86.6	26.1	30.2	12.7	39.6	159	11	15.2	0.174	1	0	0	0
255T	1	1	1	377	64	2	2	2	0.25	1	0	1	0	0	0	0	1	0	0	5	96	962	7.1	3.6	0.6	2.9	51.4	8	40.6	16.2	5.89	53.2	90.4	27.5	30.4	13	42.7	347	9.9	14.7	0.343	1	0	0	0
256T	1	0	1	187	59	2	2	8	348	1	348	1	0	0	0	0	1	1	1	3	12	746	4.1	2.2	0.4	1.5	53.7	8.9	37.4	13.2	4.97	44.8	90.2	26.5	29.4	13.4	45.7	162	11.2	15.2	0.181	1	0	0	0
257T	1	1	1	91	64	4	4	1	0.5	1	0	1	0	0	0	0	1	1	0	6	6	710	3.7	1.2	0.2	2.3	31.1	6.6	62.3	12.3	5.21	44.2	84.9	23.6	27.8	15.5	49.8	250	9.4	14.6	0.235	3	0	0	0
258T	1	0	4	133	19	4	18	11	36	0	36	0	0	0	0	0	0	0	1	1	12	685	5.1	2.3	0.5	2.3	46	8.9	45.1	12	4.76	43.3	91.1	25.2	27.7	14.7	51.9	269	10.7	14.9	0.287	1	0	0	0
259T	1	0	1	116	44	35	33	3	6	1	6	0	0	0	0	0	0	0	0	11	48	928	5	1.9	0.4	2.7	28.3	7.5	54.2	13.8	5.34	47.1	88.3	25.8	29.2	14.1	42.7	197	10.3	15	0.202	1	0	0	0
260T	1	1	1	125	33	2	2	9	1	0	0	0	0	0	0	0	0	0	0	12	24	736	9	2.4	0.5	6.1	26.4	6.1	67.5	12.8	4.86	43.1	88.7	26.3	29.6	13.3	47.9	169	10.2	15	0.172	1	0	0	1	4	R	S	R
261T	1	1	1	86	55	2	2	1	156	1	156	0	0	0	0	0	0	0	1	1	12	539	4.6	1.9	0.3	2.4	42.3	7	50.7	12.2	4.49	43	95.8	27.1	28.3	14.6	51.9	270	9	14.5	0.243	3	0	0	0
262T	1	1	1	124	66	37	5	3	180	1	180	0	0	0	0	0	0	0	1	12	24	917	7.4	3.1	0.5	3.8	41.5	7.7	50.8	11.4	5.07	40	79	22.4	28.5	13.2	38.6	310	9.7	14.4	0.3	2	0	0	0
263T	1	1	1	205	36	2	33	11	2	0	0	1	0	0	0	0	1	0	1	12	96	743	3.5	1.8	0.2	1.5	50.4	6.5	43.1	10.6	4.46	37.5	84.3	23.7	28.2	16.6	47.9	227	10.2	14.7	0.231	1	0	0	0
264T	1	1	1	147	50	29	2	8	3	1	3	1	0	0	0	0	1	0	1	1	12	635	3.8	1.7	0.3	1.8	45.7	8.1	46.2	12.3	5.02	43	85.8	24.5	28.6	15.8	47.9	317	10	14.8	0.317	3	0	0	0
265T	1	1	1	185	58	5	4	1	0.5	1	0.5	0	0	0	0	0	0	0	0	12	12	690	4.3	2.1	0.3	1.9	48	8.1	43.9	13.2	5.14	45	87.6	25.6	29.3	13.4	40.6	169	10.5	14.8	0.177	1	0	0	0
266T	1	0	1	120	67	15	5	6	240	1	240	0	0	0	0	0	0	0	1	1	˂6	471	6	2.4	0.4	3.2	39.5	7.6	52.9	12.4	4.94	43.9	88.9	25.1	28.2	14.2	50.9	317	8.7	14.2	0.275	1	0	0	0
267T	1	1	1	195	57	2	3	3	204	1	204	0	0	0	0	0	0	0	1	1	24	1137	7	3.3	0.7	3	47.7	10	42.3	8.3	3.03	30.9	102.1	27.3	26.8	14.2	58.9	281	9.7	15.1	0.272	1	0	0	0
268T	1	1	1	129	41	2	3	1	60	1	60	1	0	0	0	0	1	1	1	8	12	624	4	1.6	0.4	2	39.3	11.7	49	9.8	3.96	33	83.4	24.7	29.6	13.5	41.7	91	11.4	15.2	0.103	3	0	0	1	1
269T	1	0	4	220	21	8	28	7	1	0	1	0	0	0	0	0	0	0	0	12	48	961	7.2	2.3	0.6	4.3	32.6	8.3	59.1	12.6	5.63	43.6	77.6	22.3	28.8	17.1	44.8	354	9.7	14.5	0.343	3	0	0	0
270T	1	0	1	470	88	2	1	6	24	1	24	1	0	0	0	0	1	0	1	1	48	341	3.9	0.5	0.2	3.2	11.8	6.7	81.5	11	4.08	37.9	92.9	26.9	29	14.2	47.9	112	11	14.8	0.123	1	0	0	0
271T	1	1	1	125	64	1	5	6	1	1	1	0	0	0	0	0	0	1	0	12	12	724	4.6	2.5	0.5	1.6	54.4	10.3	35.3	12.9	5.53	44.8	81.1	23.3	28.7	14	42.7	188	10.9	15.1	0.204	3	0	0	1	8
272T	1	1	1	125	30	2	3	7	84	0	84	1	0	0	0	0	1	1	1	1	12	813	6.8	2.5	0.4	3.9	36.8	5.5	57.7	11.3	4.67	39.3	84.2	24.1	28.7	13.5	39.6	271	9.1	14.7	0.246	3	0	0	0
273T	1	0	1	108	40	10	14	6	60	1	60	0	0	0	0	0	0	1	1	12	˂6	1090	4.9	2.6	0.3	2	54	6.2	39.8	15.3	5.72	49.9	87.3	26.7	30.6	13.4	40.6	205	9.8	14.6	0.2	2	0	0	0
274T	1	0	1	70	64	4	1	8	60	1	60	0	0	0	0	0	0	0	1	1	12	711	7.5	1.6	0.6	5.3	21.9	8	70.1	12.8	4.74	42.1	89	27	30.4	13.3	41.7	242	8.6	14.4	0.208	3	0	0	0
275T	1	0	1	69	84	17	1	7	240	1	240	0	0	0	0	0	0	0	1	4	48	901	7.8	2	0.6	5.2	25.8	7.6	66.6	9.2	4.1	33.8	82.6	22.4	27.2	22.2	65.1	427	10.6	14.8	0.452	1	0	0	0
276T	1	0	4	125	8	26	18	6	24	0	24	0	0	0	0	0	0	0	0	12	12	680	5.1	2.4	0.4	2.3	46.6	9	44.4	11	4.92	39.7	80.8	22.3	27.7	15.7	44.8	354	9.2	14.2	0.325	1	0	0	0
277T	1	1	1	180	47	10	11	7	144	1	144	1	0	0	0	0	1	0	1	1	12	973	7.2	2.9	0.6	3.7	40.1	9.1	50.8	13.8	5.27	45.7	86.8	26.1	30.1	13.4	43.7	259	9.8	14.7	0.253	1	0	0	0
278T	1	1	1	130	31	38	4	7	3	1	3	0	0	0	0	0	0	0	0	12	24	754	4.9	2.1	0.3	2.5	43.5	6.5	50	12.2	4.57	39.9	87.4	26.6	30.5	12.9	40.6	294	9.6	14.3	0.282	1	0	0	0
279T	1	1	1	120	87	2	5	6	24	1	24	1	0	0	0	0	1	1	1	12	12	979	5.4	3.1	0.6	1.7	56.7	11.9	31.4	11.3	4.07	37	91	27.7	30.5	13.2	43.7	61	10.7	15.8	0.065	1	0	0	0
280T	1	1	1	80	63	2	3	6	60	1	60	0	0	0	0	0	0	0	0	12	48	911	8.5	2.7	0.7	5.1	31.8	8.5	59.7	11.2	4.38	39.8	90.9	25.5	28.1	13.8	49.8	146	10.8	15	0.157	3	0	0	0
281T	1	0	1	139	72	2	1	6	1	1	1	1	0	0	0	0	1	0	1	6	12	824	5.7	2.5	0.4	2.8	44.3	7.4	48.3	11.6	5.58	40.7	73	20.7	28.5	13.5	35.5	300	9.4	14.5	0.282	3	0	0	0
282T	1	0	1	125	69	2	1	6	240	1	240	1	0	0	0	0	1	0	1	5	12	617	4.4	2	0.4	2	45.5	8.6	45.9	12.8	4.71	43	91.5	27.1	29.7	12.8	46.7	198	9.3	14.3	0.184	1	0	0	1	2
283T	1	1	1	129	60	2	5	6	60	1	60	0	0	0	0	0	0	0	0	12	384	872	5.2	1.9	0.4	2.9	35.6	9.3	55.1	8.6	3.5	30.4	86.9	24.5	28.2	14.5	43.7	163	10.5	14.7	0.171	1	0	0	0
284T	1	1	1	204	63	9	11	1	60	1	60	0	1	0	0	0	0	0	0	11	12	701	6	2.1	0.5	3.4	35.6	8.2	56.2	11.7	4.86	41.7	86	24	28	13	47.9	215	10.8	15	0.232	1	0	0	0
285T	1	0	1	136	54	2	4	7	276	1	276	1	0	0	0	0	1	1	1	1	24	745	5.8	1.5	0.4	3.9	25.6	7.2	67.2	9.6	3.81	33.4	87.7	25.1	28.7	15.9	47.9	169	9.7	14.9	0.163	2	0	0	0
286T	1	1	1	150	37	39	3	6	36	1	36	0	0	0	0	0	0	0	1	12	48	812	8	1.6	0.5	5.9	19.9	6.1	74	14.6	5.43	48.4	89.2	26.8	30.1	12.7	40.6	226	10.7	15.1	0.241	2	0	0	0
287T	1	1	4	182	25	21	18	7	24	0	24	0	0	0	0	0	0	0	0	12	6	658	7.1	3	0.4	3.7	41.9	6.6	51.5	13.8	5.03	46	91.6	27.4	30	12.8	41.7	186	10.7	14.7	0.199	1	0	0	1	2
288T	1	0	1	127	71	2	20	3	36	1	36	1	0	0	0	0	1	0	1	11	12	714	3.7	1.8	0.4	1.5	48.4	11.2	40.4	12.9	4.87	42.7	87.7	26.4	30.2	14.3	45.7	168	9.9	14.7	0.166	1	0	0	0
289T	1	1	1	110	48	2	3	6	1	1	1	0	0	0	0	0	0	0	0	12	12	642	4.9	2.4	0.4	2.1	47.7	8.9	43.4	11.7	4.78	40	83.8	24.4	29.2	14.6	43.7	159	9.9	15.2	0.157	1	0	0	1	2
290T	1	0	1	260	50	2	4	7	36	1	36	0	0	0	0	0	0	0	0	12	24	823	5.1	1.8	0.4	2.9	35.5	7.6	56.9	12.1	5.04	42	83.5	24	28.8	15.2	46.7	248	10.5	14.9	0.26	1	0	0	0
291T	1	1	1	110	60	50	5	6	48	1	48	1	0	0	0	0	1	0	1	1	24	880	6.1	1.7	0.4	4	27.7	6.1	66.2	8.9	3.97	32.5	82	22.4	27.3	15.7	47.9	262	8.5	14.2	0.222	3	0	0	0
292T	1	0	1	250	65	41	1	6	240	1	240	0	0	0	0	0	0	0	1	12	384	812	16.5	1.6	0.7	14.2	9.4	4.4	86.2	9.4	4.02	31.7	78.9	23.3	29.6	14.5	41.7	166	10.3	15.2	0.17	2	0	0	0
293T	1	1	2	160	64	35	3	6	2	1	2	1	0	0	0	0	1	0	0	1	48	936	4.9	2.5	0.5	1.9	51.3	9.3	39.4	12.6	5.17	43	83.3	24.3	29.3	14.5	43.7	208	9.7	14.7	0.201	3	0	0	0
294T	1	1	2	150	80	15	3	6	1	1	1	1	0	0	0	0	0	0	0	1	12	741	4.6	2.3	0.4	1.9	48.7	9.4	41.9	10.3	3.96	37.3	94.3	26	27.6	15.1	55	295	9.9	14.4	0.292	2	0	0	0
295T	1	0	1	76	66	5	1	9	3	1	3	0	0	0	0	0	0	0	0	12	48	484	6.3	2.6	0.6	3.1	40.8	9.9	49.3	11.7	4.11	40.1	97.6	28.4	29.1	15.3	55.9	286	9.6	14.6	0.274	1	0	0	0
296T	1	0	1	111	68	40	22	6	168	1	168	0	0	0	0	0	0	0	1	12	48	921	8.7	3.3	0.8	4.6	37.6	10	52.4	9.9	3.95	34.2	86.7	25	28.9	12.9	41.7	295	8.9	14.2	0.262	1	0	0	0
297T	1	1	2	131	76	2	3	6	36	1	36	0	0	0	0	0	0	0	1	1	12	418	2	0.8	0.2	1	39.8	10.5	49.7	9.3	4.79	33.9	70.8	19.4	27.4	16.8	42.7	119	9.5	14.5	0.113	1	0	0	0
298T	1	0	1	165	55	12	1	2	204	1	204	0	1	0	0	0	0	0	1	1	24	617	5.8	1.5	0.4	3.9	25	7.6	67.4	10.3	4.14	35.1	84.8	24.8	29.3	13.9	44.8	278	8.9	14.8	0.247	2	0	0	0
299T	1	0	2	106	56	2	21	3	2	1	2	0	0	0	0	0	0	0	0	12	˂6	547	4.2	2.1	0.4	1.7	49.6	9.6	40.8	14.1	5.14	47.5	92.6	27.4	29.6	12.8	44.8	199	9.2	14.3	0.183	3	0	0	0
300T	1	0	1	210	54	2	11	1	60	1	60	0	0	0	0	0	0	0	0	12	12	1118	7.1	4.3	0.6	2.2	59.4	9.1	31.5	15	5.14	51.2	99.7	29.1	29.2	14.2	55	253	10.4	14.8	0.263	3	0	0	0
301T	1	0	1	102	48	35	14	8	168	1	168	0	0	0	0	0	0	0	1	12	48	721	6.6	2.1	0.6	3.9	31.3	8.9	59.8	7.1	3.23	24.6	76.4	21.9	28.8	21.5	52.8	292	9	15.1	0.262	2	0	0	0
302T	1	0	1	189	50	18	4	6	1	1	0	0	0	0	0	0	0	0	0	1	48	587	3.8	1	0.3	2.5	27.5	7	65.5	13	5.12	44.8	87.6	25.3	29	13.8	42.7	198	9.6	14.7	0.19	1	0	0	0
303T	1	1	4	169	39	2	3	7	36	1	36	1	0	0	0	0	1	1	1	12	24	711	3	1.5	0.3	1.2	50	9.1	40.9	10.8	4.81	39.1	81.3	22.4	27.6	18.9	55.9	275	10	14.8	0.275	1	0	0	0
304T	1	1	1	189	63	52	5	6	24	1	24	1	0	0	0	0	1	0	1	1	12	443	3.1	0.9	0.3	1.9	27.5	11.6	60.9	14.6	4.82	47.9	99.4	30.2	30.4	14.2	49.8	169	10.5	14.9	0.177	2	0	0	0
305T	1	0	1	178	65	5	14	6	60	1	60	0	0	0	0	0	0	0	1	12	48	910	3.8	2.2	0.4	1.2	59	10.3	30.7	11.2	4.71	39.7	84.4	23.7	28.2	13.9	42.7	134	9.1	14.3	0.121	1	0	0	1	3
306T	1	0	1	130	55	31	14	7	12	1	12	0	0	0	0	0	0	0	1	12	12	717	4.5	1.9	0.4	2.2	41.6	8.6	49.8	14.2	5.08	47	92.6	27.9	30.2	13.5	44.8	287	9.2	14.6	0.264	3	0	0	0
307T	1	0	1	74	67	41	5	6	216	1	120	0	1	0	0	0	0	0	1	5	48	680	5.4	1.5	0.3	3.6	27.8	6.3	65.9	8.4	3.71	29.3	79.2	22.6	28.6	15.2	44.8	338	10.6	15.4	0.358	1	0	0	0
308T	1	0	1	90	75	2	1	3	3	1	3	0	1	0	0	0	0	0	1	5	˂6	1217	10.3	4.2	0.9	5.2	40.6	8.5	50.9	11.6	4.65	41.5	89.3	24.9	27.9	20.3	69.1	289	9.8	15	0.253	1	0	0	0
309T	1	0	1	240	46	4	4	7	48	1	48	0	0	0	0	0	0	0	1	12	48	1008	3.8	2	0.4	1.4	51.6	12.4	36	13.5	5.13	46.2	90.2	26.3	29.2	12.2	41.7	302	9.8	14.6	0.295	1	0	0	0
310T	1	0	1	110	47	6	16	8	12	1	12	0	0	0	0	0	0	0	1	12	24	776	3.1	1.4	0.2	1.5	43.9	7.7	48.4	14.7	5.54	51.3	92.6	26.5	28.6	14.2	50.9	136	11.2	15.1	0.152	1	0	0	0
311T	1	1	1	192	53	2	3	7	96	1	84	1	0	0	0	0	1	1	1	3	12	1218	8.6	4.1	0.6	3.9	47.5	7.4	45.1	13.2	4.84	46.4	95.9	27.2	28.4	12.7	47.9	301	10.8	14.7	0.325	3	0	0	0
312T	1	1	1	185	46	2	9	7	36	1	36	0	0	0	0	0	0	0	1	12	12	951	4.4	2.1	0.4	1.9	47.2	8.9	43.9	11	4.82	38.5	80	22.8	28.5	16.5	49.8	249	9.5	14.4	0.236	1	0	0	0
313T	1	1	1	153	89	2	5	6	24	1	24	0	0	0	0	1	0	1	1	12	24	748	5.6	1.6	0.3	3.7	27.7	7	65.3	13	5.19	47.8	92.2	25	27.1	13.5	49.8	247	9	14.3	0.222	1	0	0	0
314T	1	0	1	300	43	2	34	6	2	1	0	1	0	0	0	0	1	0	0	12	6	780	5.2	2.4	0.5	2.3	45	10.2	44.8	15.1	5.52	51.1	92.6	27.3	29.5	14.2	49.8	225	10.5	14.8	0.236	3	0	0	0
315T	1	0	1	93	42	2	4	7	24	1	24	0	0	0	0	0	0	0	1	12	˂6	617	3.7	2.5	0.4	0.8	66.1	11.2	22.7	14.2	5.13	49.3	96.2	27.6	28.8	12.9	52.8	235	10.7	14.7	0.251	5	0	0	0
316T	1	0	1	96	58	48	14	6	12	1	12	0	0	0	0	0	0	0	0	12	12	718	3.9	1.9	0.8	1.2	48.7	19.9	31.4	13.9	6.11	48.5	79.5	22.7	28.6	13.8	39.6	190	10.7	14.8	0.203	1	0	0	0
317T	1	1	1	139	53	42	3	6	180	1	168	0	0	0	1	0	0	1	1	5	12	768	6.2	2.3	0.5	3.4	37.9	7.8	54.3	9.7	4.17	32.6	78.3	23.2	29.7	13.4	39.6	284	8.9	14.5	0.252	1	0	0	0
318T	1	1	1	145	60	4	5	6	12	1	12	1	0	0	0	0	0	1	1	6	6	1347	6.5	2.8	0.7	3	43	10.1	46.9	12	5.59	43.3	77.6	21.4	27.7	15.8	47.9	195	11.4	15	0.222	1	0	0	0
319T	1	1	1	150	59	29	3	6	60	1	60	0	0	0	0	0	0	0	1	12	6	1125	5.6	3.4	0.5	1.7	61	9.5	29.5	11.8	4.35	41	94.4	27.1	28.7	14.5	51.9	201	9.4	14.4	0.188	1	0	0	0
320T	1	0	1	110	78	2	4	6	48	1	48	0	0	0	0	0	0	0	1	6	12	1230	10.9	3.4	1	6.5	31	9.2	59.8	14.2	5.11	50.1	98.1	27.7	28.3	12.8	50.9	231	9.9	14.5	0.228	3	0	0	0
321T	1	1	2	102	50	43	9	6	120	1	120	0	0	0	0	0	0	0	1	12	24	678	3.5	1.5	0.4	1.6	42.8	10.7	46.5	9	4.06	32.8	81	22.1	27.4	17	47.9	194	8.9	14.7	0.172	1	0	0	0
322T	1	1	1	106	60	2	3	6	24	1	12	1	0	0	0	0	1	1	1	12	24	816	11.4	2.3	0.8	8.3	20	7.2	72.8	13.1	5.05	45.6	90.4	25.9	28.7	13.4	44.8	373	9.1	14.4	0.339	3	0	0	0
323T	1	1	1	186	74	2	3	6	12	1	0	1	0	0	0	0	1	0	0	8	96	1248	10.3	6.2	0.9	3.2	60.4	8.4	31.2	8.6	3.99	32	80.3	21.5	26.8	19.1	53.9	80	11.6	15.6	0.092	2	0	0	0
324T	1	1	1	99	50	2	3	6	10	1	0	0	0	0	0	0	0	0	0	12	˂6	480	4	1.3	0.3	2.4	31.7	8.4	59.9	11.4	4.37	39.2	89.8	26	29	12.6	39.6	271	9.3	14.5	0.252	1	0	0	0
325T	1	1	1	102	75	2	3	6	3	1	0	0	0	0	0	0	0	0	0	12	24	923	4.1	2.2	0.4	1.5	52.3	10.7	37	10.6	4.57	38.5	84.3	23.1	27.5	12.9	43.7	153	8.8	14.4	0.134	3	0	0	0
326T	1	0	1	101	72	44	1	7	96	1	84	1	0	0	0	0	1	0	1	4	12	916	5.3	2.5	0.4	2.4	46.3	8.6	45.1	10.3	4.1	25.6	87	25.1	28.9	15.3	46.7	488	9.3	14.5	0.453	1	0	0	0
327T	1	1	4	122	22	2	3	6	2	0	2	1	0	0	0	0	1	1	1	1	12	708	3.1	1.5	0.3	1.3	47.5	9.3	43.2	13.2	5.36	46	86	24.6	28.6	13.6	44.8	245	9.6	14.7	0.235	2	0	0	0
328T	1	0	1	180	48	2	17	1	96	1	96	0	0	0	0	0	0	0	1	12	˂6	617	4.5	2.1	0.3	2.1	46	6.6	47.4	14.9	6.06	51.5	85	24.5	28.9	12.9	44.8	290	9.7	14.7	0.281	1	0	0	1	2
329T	1	0	1	105	75	2	1	3	180	1	168	0	1	0	0	0	0	0	1	1	6	750	5.3	2.1	0.3	2.9	40.2	6.1	53.7	13.8	5.15	45	87.5	26.7	30.6	14.1	45.7	207	10.9	15.1	0.225	1	0	0	0
330T	1	0	1	111	73	33	1	8	12	1	12	0	0	0	0	0	0	0	1	5	12	481	3.1	1.3	0.2	1.6	43.2	7.1	49.7	13.5	5.27	45.6	86.7	25.6	29.6	12.2	39.6	186	9.2	14.8	0.171	3	0	0	0
331T	1	0	1	95	59	2	2	8	348	1	348	0	0	0	0	0	0	0	1	3	24	1028	5.3	2.8	0.5	2	51.9	9.7	38.4	14.3	5.38	48.8	90.8	26.5	29.3	14.2	50.9	178	10.7	15.1	0.19	3	0	0	0
332T	1	1	1	136	79	45	5	6	72	1	72	1	0	0	0	0	1	0	1	1	˂6	971	8.2	4.3	0.6	3.3	52.6	7.2	40.2	12.6	4.64	43.1	93.1	27.1	29.2	12.7	44.8	248	9.7	14.7	0.24	1	0	0	0
333T	1	0	1	380	49	2	12	2	2	1	0	0	0	0	0	0	0	0	0	12	6	564	5	1.5	0.4	3.1	29.9	7.8	62.3	16.2	5.82	53.3	91.6	27.8	30.3	13.4	39.6	132	9.9	14.9	0.13	1	0	0	0
334T	1	1	2	101	78	2	5	6	36	1	36	0	1	0	0	0	0	1	1	3	48	1210	6.1	2.8	0.5	2.8	45.2	9.5	45.3	12.3	5.23	43.3	82.9	23.5	28.4	13.2	41.7	345	9.4	14.4	0.324	1	0	0	1	2
335T	1	1	1	345	38	1	27	6	60	1	60	0	0	0	0	0	0	1	1	12	6	974	5.7	2.5	0.4	2.8	43.2	8	48.8	13.9	5.07	45.9	90.6	27.4	30.2	12.2	38.6	289	9.3	14.4	0.268	1	0	0	0
336T	1	0	1	125	76	2	1	8	36	1	36	0	1	0	0	0	0	1	1	1	6	654	4.3	1.8	0.4	2.1	41.9	10	48.1	13.1	4.72	44.7	94.9	27.7	29.3	13.6	49.8	205	9.6	14.6	0.196	1	0	0	0
337T	1	1	2	74	71	50	5	6	96	1	96	1	0	0	0	1	1	0	1	4	48	947	5.8	2.7	0.6	2.5	46.4	10.5	43.1	12	4.57	42.6	93.4	26.2	28.1	14.8	52.8	290	9.2	14.4	0.266	1	0	0	0
338T	1	1	1	102	45	34	5	6	8	1	0	1	0	0	0	0	1	1	0	4	48	842	5.8	2.2	0.5	3.1	37.4	8.6	54	14.1	5.76	48.8	84.8	24.4	28.8	13.9	41.7	256	10.3	14.9	0.263	2	0	0	0
339T	1	0	1	151	66	2	1	6	144	1	144	0	0	0	0	0	0	0	1	12	48	741	6.7	2.3	0.4	4	34.1	6.3	59.6	9.9	3.98	36.4	91.7	24.8	27.1	15.5	51.9	275	8.9	14.4	0.244	1	0	0	1	10
340T	1	0	1	136	65	29	1	8	240	1	228	1	0	0	0	0	1	0	1	6	6	513	4.2	1.1	0.3	2.8	27.2	7.3	65.5	11.9	4.6	43	93.6	25.8	27.6	14.2	47.9	168	10.4	14.7	0.174	3	0	0	0
341T	1	1	1	145	65	2	1	6	36	1	36	0	1	0	0	1	0	0	1	12	12	614	1.7	1.2	0.1	0.4	65.8	8.8	25.4	6.9	2.88	25.4	88.4	23.9	27.1	14.6	46.7	86	10.1	14.9	0.086	2	0	0	0
342T	1	0	1	166	50	2	4	2	10	1	0	1	0	0	0	0	1	1	0	10	12	871	5.4	2.6	0.4	2.4	47.1	7.9	45	14.7	5.84	53.1	91	25.1	27.6	14.6	47.9	203	10.7	14.9	0.217	1	0	0	0
343T	1	1	1	170	47	2	3	1	144	1	144	0	0	0	0	0	0	0	1	9	24	762	8.9	2.1	0.6	6.2	23.5	7	69.5	14.6	6.26	51.8	82.9	23.3	28.1	12.4	39.6	262	9.9	14.6	0.259	1	0	0	0
344T	1	0	1	300	55	2	17	1	0.5	1	0	11	0	0	0	0	1	0	0	3	6	847	5.6	2.6	0.6	2.4	46.8	9.9	43.3	13.8	5.21	48.7	93.5	26.4	28.3	14.8	51.9	220	11	14.9	0.242	1	0	0	1	2
345T	1	1	1	104	56	2	2	2	72	1	72	0	0	0	0	0	0	1	1	1	24	947	4.3	2	0.4	1.9	45.8	9.2	45	11.6	4.83	41.7	86.5	24	27.8	15.1	47.9	269	9.7	14.6	0.26	3	0	0	0
346T	1	0	1	155	72	2	14	6	12	1	0	1	0	0	0	0	1	0	0	1	12	614	5	2.2	0.4	2.4	43.7	7.7	48.6	10	4.04	37	91.8	24.7	27	16.1	55	228	10	14.5	0.228	3	0	0	0
347T	1	1	1	153	60	12	5	6	24	1	24	1	0	0	0	0	1	1	1	1	12	769	4.7	2.3	0.4	2	48.1	10.1	41.8	11.5	4.76	43	90.5	24.1	26.7	14.6	50.9	242	10.3	14.7	0.249	1	0	0	0
348T	1	0	1	200	75	2	1	8	60	1	60	0	0	0	0	0	0	0	1	12	12	814	4.7	2.3	0.3	2.1	48.1	7.5	44.4	14	5.54	48.1	87	25.2	29.1	14	42.7	195	10.4	14.6	0.202	1	0	0	0
349T	1	1	2	98	70	17	5	6	48	1	48	1	0	0	0	0	1	0	1	7	24	625	4	1.5	0.4	2.1	36.8	9.5	53.7	11.8	5.19	42	81.1	22.7	28	15.3	46.7	294	9.7	14.4	0.285	1	0	0	0
350T	1	0	4	89	39	2	22	8	60	1	60	0	1	0	0	0	0	0	1	6	24	876	6.8	2.2	0.6	4	32.2	8.7	59.1	15.4	6.15	53.3	86.8	25	28.8	13.6	42.7	258	10.3	14.6	0.265	1	0	0	0
351T	1	1	2	320	70	2	5	6	156	1	156	1	0	0	0	0	0	0	1	12	24	984	6.8	2.5	0.5	3.8	36.7	7.5	55.8	10.6	3.95	39.4	99.9	26.8	26.9	14	58	356	9.2	14.5	0.327	1	0	0	1	11
352T	1	0	1	103	53	2	2	8	108	1	108	0	1	0	0	0	0	0	1	3	6	1127	5.3	2.8	0.5	2	52.8	8.9	38.3	10.8	4.51	38.6	85.7	23.9	27.9	12.7	41.7	207	9.8	14.9	0.202	1	0	0	0
353T	1	1	1	140	59	2	11	8	228	1	228	0	0	0	0	0	0	0	1	1	24	1027	5.3	3.3	0.5	1.5	62.6	8.9	28.5	12.3	4.8	45.2	94.2	25.6	27.2	12.8	46.7	293	9.4	14.3	0.275	1	0	0	0
354T	1	1	1	196	50	2	28	6	168	1	168	0	0	0	0	0	0	1	1	12	96	714	3.2	1.9	0.3	1	57.7	10.2	32.1	11.8	4.69	43.1	91.9	25.1	27.3	13.2	47.9	186	10.2	15.2	0.189	2	0	0	0
355T	1	0	1	107	65	2	14	6	168	1	168	1	0	0	1	0	0	1	1	1	24	712	6	1.6	0.6	3.8	26.4	9.6	64	12.3	4.65	43.9	94.6	26.4	28	14	48.8	197	9.6	14.9	0.189	2	0	0	0
356T	1	1	2	150	86	2	5	6	120	1	120	0	0	0	0	0	0	0	1	11	6	1219	5.5	3	0.5	2	54.1	9.3	36.6	11	4.35	41.3	95.1	25.2	26.6	15.4	58	317	10.2	14.6	0.323	1	0	0	0
357T	1	0	1	266	45	5	17	7	144	1	144	0	0	0	0	0	0	0	1	10	96	740	3.9	1.6	0.2	2.1	40.3	6.9	52.8	14.6	5.43	50.5	93.1	26.8	28.9	12.7	43.7	231	9.7	14.7	0.224	1	0	0	0
358T	1	1	1	136	38	2	29	1	0.25	1	0	1	0	0	0	1	1	0	0	12	96	813	5.3	2.1	0.3	2.9	38.9	6.8	54.3	10.7	4.21	39.7	94.5	25.4	26.9	25.1	53.9	358	9.1	14.6	0.325	1	0	0	0
359T	1	0	1	135	43	2	34	6	1	1	0	1	0	0	0	0	1	0	0	12	6	910	5	2.4	0.4	2.2	48.1	8.4	43.5	13.7	5.32	50.4	94.8	25.7	27.1	14.2	50.9	219	9.8	14.5	0.214	1	0	0	0
360T	1	1	1	300	66	2	3	6	84	1	84	1	0	0	0	0	1	0	1	1	48	818	6.3	2.8	0.5	3	44.9	8.6	46.5	10.4	4.12	38.9	94.6	25.2	26.7	14.2	51.9	469	9.7	14.4	0.454	1	0	0	1	2
361T	1	0	1	130	54	2	11	7	60	1	60	0	0	0	0	0	0	0	1	12	48	741	8.4	3.2	0.5	4.7	38.1	5.8	56.1	14	5.12	51.2	100.1	27.3	27.3	14	55.9	269	9.8	14.6	0.263	2	0	0	0
362T	1	0	1	101	55	2	16	8	108	1	108	1	0	1	0	0	1	1	1	1	48	1023	3.9	2.5	0.4	1	63.3	11	25.7	13.5	5.5	47.8	87	24.5	28.2	14.3	48.8	160	9.9	14.9	0.158	1	0	0	0
363T	1	0	1	272	68	2	1	7	84	1	84	0	1	0	0	0	0	0	1	3	48	983	6.6	3.2	0.6	2.8	49.2	8.5	42.3	13.2	5.59	47.7	85.4	23.6	27.6	14.2	46.7	235	10.2	14.9	0.239	1	0	0	0
364T	1	1	1	139	51	46	5	8	24	1	24	0	0	0	0	0	0	0	0	12	12	614	4.5	1.4	0.3	2.8	31.4	6	62.6	11.9	4.65	43.5	93.7	25.5	27.3	13.6	45.7	265	9.1	14.3	0.241	3	0	0	0
365T	1	1	4	120	36	2	29	7	84	1	84	1	0	0	0	0	1	0	1	12	12	858	4.9	1.8	0.3	2.8	37.1	5.2	57.7	9.8	3.81	36	94.6	25.7	27.2	12.8	49.8	190	10	15.1	0.19	2	0	0	0
366T	1	0	1	101	62	9	1	7	96	1	96	0	1	0	0	0	0	1	1	12	24	417	3	1	0.3	1.7	33.3	11	55.7	13.9	5.36	50.1	93.5	25.9	27.7	14.2	51.9	213	9.4	14.8	0.2	2	0	0	0
367T	1	1	1	106	52	47	5	6	120	1	24	1	0	0	0	1	1	0	1	3	6	618	4.4	2.3	0.4	1.7	52.5	8.7	38.8	11.3	4.68	40.5	86.7	24.1	27.9	13	47.9	316	9.2	14.6	0.29	3	0	0	0
368T	1	1	2	156	63	2	3	6	24	1	0	1	0	0	0	0	1	1	0	1	24	1147	5.9	2.5	0.3	3.1	42.4	5.9	51.7	12.1	4.79	44.6	93.3	25.2	27.1	14.2	53.9	214	10.3	15.4	0.22	3	0	0	0
369T	1	1	1	249	51	2	2	7	96	1	96	0	0	0	0	0	0	1	1	3	12	743	4.7	2.1	0.4	2.2	44.7	8.7	46.6	11.7	5.05	42.6	84.4	23.1	27.4	13.9	42.7	264	8.5	14.1	0.224	1	0	0	0
370T	1	1	1	109	71	50	5	6	228	1	228	0	0	0	0	0	0	0	1	12	6	659	5.2	2.3	0.4	2.5	44.6	7.8	47.6	10.5	4.28	39.5	92.5	24.5	26.5	13.5	50.9	277	9.9	14.8	0.274	2	0	0	0
371T	1	1	2	142	69	2	5	6	24	1	24	1	0	0	0	0	1	1	1	1	192	958	3.1	1.7	0.2	1.2	55.9	6.4	37.7	9.7	4.18	36.1	86.6	23.2	26.8	15.1	47.9	125	10.9	15	0.136	2	0	0	0
372T	1	0	1	150	82	2	1	7	156	1	156	0	1	0	0	0	0	0	1	4	6	915	5	2.4	0.3	2.3	47.3	7.6	45.1	9.2	3.68	33.9	92.2	25	27.1	15.1	55	194	10.4	14.6	0.201	3	0	0	0
373T	1	1	1	124	43	2	3	7	120	1	120	0	0	0	0	0	0	0	1	8	12	682	3	1.5	0.2	1.3	50.1	7.9	42	9.5	4.59	35.5	77.5	20.6	26.7	17.8	49.8	420	9.6	14.7	0.403	3	0	0	0
374T	1	1	1	122	47	5	3	6	12	1	0	1	0	0	0	0	0	0	0	5	48	729	3.7	1.8	0.4	1.5	49.7	9.9	40.4	11.2	4.71	40	85	23.7	28	13.3	42.7	196	9.4	14.9	0.184	3	0	0	1	2
375T	1	1	1	172	56	50	3	6	228	1	228	0	0	0	0	0	0	1	1	1	24	841	5.6	2.4	0.4	2.8	42.8	7.7	49.5	9.7	4.13	35.4	85.8	23.4	27.4	14.6	45.7	259	9.8	14.8	0.253	3	0	0	1	2
376T	1	1	1	150	31	2	3	7	96	1	96	0	0	0	0	0	0	0	1	3	24	740	5.4	2.2	0.6	2.6	41.5	10.5	48	11.6	4.87	40.6	83.5	23.8	28.5	13.9	41.7	258	9.2	14.6	0.237	1	0	0	0
377T	1	0	1	107	85	17	1	6	240	1	228	0	1	0	0	0	0	0	1	1	24	677	6.5	1.5	0.6	4.4	23.3	8.6	68.1	11.3	4.71	40.7	86.5	23.9	27.7	17.7	64.1	213	10.7	15	0.227	1	0	0	0
378T	1	0	1	51	39	35	35	2	36	1	36	0	0	0	0	0	0	0	1	12	˂6	1319	5.7	3.1	0.6	2	55	9.9	35.1	13.6	5.23	46.3	88.6	26	29.3	14.7	48.8	242	9.6	14.6	0.232	1	0	0	0
379T	1	0	1	186	64	2	1	2	24	1	24	1	0	0	0	0	1	1	1	1	6	816	5.1	2.7	0.4	2	52.8	8.7	38.5	15.1	5.37	52.5	97.9	28.1	28.7	13.3	46.7	194	9.3	14.3	0.18	1	0	0	0
380T	1	0	1	246	75	2	1	2	300	1	240	1	0	0	0	0	1	1	1	1	6	952	5.6	2.5	0.5	2.6	44.5	9.7	45.8	15	5.39	51.8	96.2	27.8	28.9	12.9	48.8	205	10.3	14.6	0.211	2	0	0	0
381T	1	1	1	160	56	4	5	6	120	1	120	1	0	0	0	1	1	0	1	8	24	773	5.7	2.4	0.4	2.9	42.1	6.2	51.7	7.7	3.11	28	90.1	24.7	27.5	12.8	45.7	186	9.6	14.5	0.178	2	0	0	0
382T	1	1	1	118	62	2	3	7	0.5	1	0	1	0	0	0	0	1	1	0	12	12	664	5.1	1.6	0.6	2.9	31.7	11.2	57.1	7.6	2.98	28.2	94.8	25.5	26.9	17.9	61.1	304	8.8	14.4	0.267	2	0	0	0
383T	1	0	1	102	70	1	1	6	0.75	1	0	0	0	0	0	0	0	0	0	1	6	854	4.1	1.9	0.5	1.7	46.1	11.8	42.1	14	5.24	48.1	91.8	26.7	29.1	14.1	48.8	248	9.2	14.3	0.228	1	0	0	0
384T	1	1	1	240	34	2	11	7	12	1	12	0	0	0	0	0	0	0	1	3	6	735	3.8	2.1	0.5	1.2	56	12.9	31.1	10	4.47	36.2	81.1	22.3	27.6	16.6	50.9	316	10.3	14.7	0.325	3	0	0	0
385T	1	1	1	250	45	5	5	6	12	1	0	1	0	0	0	0	1	1	0	12	12	1022	6	2.8	0.7	2.5	46.1	12	41.9	9	4.2	35.7	85.2	21.4	25.2	26.1	72.3	376	9.9	14.6	0.372	2	0	0	0
386T	1	1	1	218	45	2	3	7	144	1	120	0	0	0	0	0	0	1	1	3	6	825	6.1	2.6	0.4	3.1	43.1	7.3	49.6	14	5.85	48.3	82.6	23.9	28.9	13.4	42.7	231	9.7	14.6	0.224	2	0	0	0
387T	1	1	1	124	46	17	7	7	36	1	36	0	0	0	0	0	0	0	1	5	6	746	7.2	2.5	0.5	4.2	35.2	6.5	58.3	13.2	5.36	45.9	85.8	24.6	28.7	14.6	45.7	373	12.3	14.9	0.458	3	0	0	0
388T	1	0	1	138	79	2	1	6	216	1	204	0	1	0	0	0	0	0	1	1	24	1311	9.9	3.6	0.7	5.6	36.6	7.1	56.3	14.8	5.29	52.2	98.8	27.9	28.3	13.2	55	208	9.8	14.5	0.203	2	0	0	0
389T	1	1	1	77	63	2	3	6	60	1	60	0	1	0	0	0	0	1	1	11	6	633	4.8	1.7	0.5	2.6	35.5	10.5	54	10.1	4.04	36.6	90.7	25	27.5	13.8	50.9	123	10.1	14.9	0.124	3	0	0	0
390T	1	0	1	107	64	6	31	6	48	1	48	0	0	0	0	0	0	0	1	3	12	321	4.2	0.9	0.4	2.9	22.5	10.4	67.1	14	4.87	48.1	98.8	28.7	29.1	13.9	55	258	10.1	14.9	0.26	3	0	0	0
391T	1	1	1	117	64	2	3	6	12	1	0	1	0	0	1	0	0	1	0	1	6	824	5.7	2.4	0.7	2.6	41.6	12.9	45.5	12.6	5.02	45.4	90.5	25	27.7	13.4	49.8	324	9.3	14.4	0.301	3	0	0	0
392T	1	0	1	102	58	48	14	6	12	1	0	1	0	0	0	0	1	0	0	12	192	982	7.2	2.4	1.1	3.7	33.2	15.2	51.6	11.3	5.18	40.7	78.6	21.8	27.7	16.7	48.8	110	11.1	15.4	0.122	3	0	0	0
393T	1	1	4	100	7	4	18	6	12	0	12	0	0	0	0	0	0	0	1	12	6	940	5.1	3	0.5	1.6	58.6	10.3	31.1	11.8	5	41.6	83.2	23.6	28.3	13.5	45.7	249	10	14.8	0.249	3	0	0	0
394T	1	1	1	120	56	2	1	7	120	1	120	1	0	0	0	0	1	1	1	1	6	913	5.4	2.2	0.6	2.6	40.6	10.7	48.7	14.1	5.72	49.5	86.6	24.6	28.4	13.4	44.8	148	12	15.1	0.177	1	0	0	0
395T	1	0	1	250	46	25	2	7	60	1	60	1	0	0	0	0	1	0	1	5	˂6	771	3.8	1.4	0.3	2.1	36.3	8.7	55	14.3	5.48	48.2	88.1	26	29.6	12.2	38.6	293	8.8	14.2	0.257	1	0	0	0
396T	1	0	1	300	32	2	31	2	24	1	24	1	0	0	0	0	1	0	1	12	12	941	6.2	2.7	0.6	2.9	43.7	9.9	46.4	15.5	6	51	85.1	25.8	30.3	12.6	37.5	174	10.8	14.8	0.187	1	0	0	0
397T	1	0	4	101	30	2	11	9	1	0	0	1	0	0	0	0	1	0	0	11	12	643	3.6	1.5	0.2	1.9	41.3	7.3	51.4	14.3	5.21	48.9	93.9	27.4	29.2	13.3	46.7	181	10.7	14.7	0.193	1	0	0	0
398T	1	0	1	244	62	2	36	8	60	1	60	1	0	0	0	0	1	0	1	6	24	824	4.3	2.2	0.3	1.8	51.1	8.1	40.8	14.4	5.08	48.4	95.4	28.3	29.7	13.2	45.7	147	11.4	15.3	0.167	3	0	0	0
399T	1	0	1	149	76	2	1	7	120	1	120	0	0	0	0	0	0	0	1	1	6	687	4.2	1.5	0.4	2.3	35.9	9.6	54.5	9.5	3.95	35.6	90.2	24	26.6	18.4	58	303	9.4	14.7	0.284	1	0	0	0
400T	1	0	1	99	70	41	5	6	132	1	132	0	0	0	0	0	0	0	1	4	12	764	7.3	2.3	0.5	4.5	31.2	7.4	61.4	15.5	5.84	53.7	92.1	26.5	28.8	13.2	43.7	288	9.6	14.8	0.276	3	0	0	0
401T	1	0	1	302	45	2	12	1	12	1	0	1	0	0	0	0	1	0	0	3	12	463	4.6	1.9	0.4	2.3	40.3	9.7	50	13.8	5.77	48.6	84.4	23.9	28.3	14.5	48.8	208	9.8	14.4	0.203	1	0	0	0
402T	1	1	1	120	58	2	4	7	36	1	0	1	0	0	0	0	1	0	0	8	12	697	5	1.8	0.4	2.8	35.6	8.8	55.6	13.3	5.2	45.8	88.2	25.5	29	13.8	42.7	147	11	14.6	0.161	1	0	0	0
403T	1	1	2	78	80	15	5	6	2	1	0	1	0	0	0	0	1	0	0	8	24	853	5.1	2.2	0.5	2.4	42.2	11.3	46.5	11.1	4.37	40.8	93.5	25.4	27.2	13.3	52.8	240	9.8	14.6	0.235	3	0	0	0
404T	1	1	1	131	31	38	4	7	60	1	0	1	0	0	0	1	1	1	0	12	24	465	5.3	1	0.5	3.8	19.4	8.5	72.1	10.1	3.71	35.1	94.7	27.2	28.7	14.8	45.7	187	9.2	14.3	0.172	2	0	0	1	6
405T	1	1	1	129	39	2	3	6	2	1	0	1	0	0	0	1	1	0	0	12	˂6	846	6.3	2.6	0.5	3.2	40.8	9.2	50	11	4.75	39.2	82.7	23.1	28	13.2	44.8	213	10.7	15.1	0.227	1	0	0	1	1
406T	1	0	1	106	66	4	1	7	3	1	0	1	0	0	0	0	1	0	0	12	˂6	723	4.8	2.3	0.4	2.1	46.7	9.1	44.2	13	5.07	44.4	87.6	25.6	29.2	13.4	45.7	238	9.7	14.6	0.23	3	0	0	0
407T	1	1	1	150	60	2	3	6	204	1	192	0	0	0	0	0	0	0	1	4	12	719	3.8	1.6	0.4	1.8	41.8	10.3	47.9	10.8	4.06	37.7	93	26.6	28.6	14.5	46.7	164	10.6	14.9	0.173	1	0	0	1	3
408T	1	0	1	380	71	49	1	7	36	1	36	1	0	0	0	0	1	0	1	6	24	681	2.5	1.2	0.2	1.1	47.4	10.6	42	13.5	4.97	45.6	91.9	27.1	29.6	12.6	41.7	253	8.7	14.1	0.22	1	0	0	0
409T	1	0	1	147	64	5	1	11	36	1	24	0	0	0	0	0	0	0	1	12	6	821	5.1	2.2	0.5	2.4	44	9.6	46.4	15.2	5.52	52.8	95.8	27.5	28.7	13.5	50.9	186	10	14.7	0.186	3	0	0	0
410T	1	1	1	186	51	2	3	7	72	1	60	0	0	0	0	0	0	0	1	12	12	863	3.5	1.4	0.3	1.8	39.7	9.7	50.6	13.1	5.53	46.3	83.8	23.6	28.2	12.8	37.5	261	10.1	14.4	0.263	3	0	0	1	3
411T	1	0	1	301	50	2	21	2	24	1	0	1	0	0	0	0	1	1	0	4	6	1011	7.1	3.3	0.9	2.9	46	12.7	41.3	13.5	4.89	47.7	97.6	27.6	28.3	13.6	52.8	315	9	14.3	0.283	1	0	0	0
412T	1	0	1	117	60	2	1	7	96	1	96	0	1	0	0	0	0	1	1	1	6	1028	6.6	2.9	0.5	3.2	43.8	8.1	48.1	10.1	4.03	35.7	88.8	25	28.2	20.1	63	382	9.2	14.6	0.351	2	0	0	0
413T	1	1	1	160	46	2	3	7	36	1	36	0	0	0	0	0	0	1	1	11	12	743	7.1	1.7	0.5	4.9	24.4	6.8	68.8	9	3.53	30.9	87.6	25.4	29.1	13.4	41.7	168	9.1	14.5	0.152	1	0	0	0
414T	1	0	1	130	62	6	5	7	24	1	0	1	0	0	0	0	1	0	0	5	12	847	4.3	1.9	0.4	2	43.6	9.7	46.7	12.5	4.88	44.7	91.8	25.6	27.9	13.5	46.7	221	9.7	14.6	0.214	1	0	0	0
415T	1	1	1	147	55	2	3	7	48	1	48	0	0	0	0	0	0	1	1	1	12	903	4.7	1.9	0.3	2.5	40	7.6	52.4	12.5	4.82	42.7	88.6	25.9	29.2	13.6	43.7	221	10.7	14.9	0.236	3	0	0	0
416T	1	0	1	103	75	2	1	6	156	1	156	0	0	0	0	0	0	0	1	1	12	762	4.5	1.8	0.4	2.3	41	7.9	53	13	4.99	43.2	89.3	26.7	29.6	13.6	42.1	223	9.7	14.8	0.256	3	0	0	0
417T	1	1	1	213	40	39	3	6	60	1	24	1	0	0	0	0	1	1	1	8	12	862	4.9	1.7	0.4	2.8	33.8	8.1	58.1	11.1	4.65	38.6	83.1	23.8	28.7	13.2	41.7	192	10.2	14.7	0.195	2	0	0	1	4	R	R	R
418T	1	0	1	385	82	2	4	6	360	1	360	1	0	0	0	0	1	0	1	3	24	885	4.6	2.2	0.5	1.9	47.1	11.4	41.5	10.8	4.83	39.7	82.4	22.3	27.2	15.7	51.9	293	8.7	14.5	0.254	1	0	0	0
419T	1	1	1	150	55	4	3	6	6	1	0	1	0	0	0	0	1	0	0	8	6	458	6.3	1.9	0.5	3.9	30.1	7.4	62.5	13	4.52	44.4	98.3	28.7	29.2	12.3	44.8	286	10.2	14.6	0.291	1	0	0	0
420T	1	1	3	102	52	2	4	6	36	1	36	0	0	0	0	0	0	1	1	1	˂6	1302	5.2	2.7	0.4	2.1	51.6	8.4	40	11.5	4.49	40.9	91.3	25.6	28.1	14.1	50.9	272	10.5	14.7	0.285	1	0	0	0
421T	1	1	1	90	50	50	3	7	7	1	0	1	0	0	0	0	1	0	0	12	12	654	4.5	1.8	0.4	2.3	40.1	9.3	50.6	13.4	5.26	46.2	88	25.4	29	12.9	42.7	201	11.2	15	0.225	1	0	0	0
422T	1	1	1	128	37	2	2	2	12	1	3	0	0	0	0	0	0	0	1	12	˂6	620	3.7	1.4	0.3	2	36.5	9.2	54.3	7.9	5.04	31.5	62.5	15.6	25	24.7	51.9	524	10.2	14.5	0.534	1	0	0	0
423T	1	0	1	223	55	2	11	8	9	1	0	1	0	0	0	0	1	0	0	1	˂6	813	4.2	1.6	0.4	2.2	37	9.6	53.4	14.2	4.98	48.9	98.3	28.5	29	13.3	49.8	256	9.3	14.5	0.238	2	0	0	0
424T	1	0	1	256	59	13	1	7	1	1	0	1	0	0	0	0	1	0	0	12	˂6	658	4.5	1	0.4	3.1	22.3	7.9	69.8	13.2	5.28	45.4	86.1	25	29	12.7	39.6	185	10.1	14.9	0.186	1	0	0	0
425T	1	1	1	147	58	45	3	6	24	1	12	0	0	0	0	0	0	1	1	8	˂6	748	4.4	2.1	0.3	2	46.7	8.6	44.7	11.5	4.84	40.7	84.2	23.7	28.2	13.9	46.7	288	9.2	14.4	0.264	1	0	0	0
426T	1	1	1	180	63	2	3	6	36	1	36	0	0	0	0	0	0	1	1	12	48	961	6	2.7	0.7	2.6	44.5	11.6	43.9	12.1	5.11	43.5	85.2	23.6	27.8	14.6	47.9	249	10.3	14.8	0.256	1	0	0	0
427T	1	1	1	117	64	2	3	7	216	1	216	0	0	0	0	0	0	1	1	4	6	822	4.8	2.1	0.4	2.3	42.9	8.4	48.7	11.5	5.02	42.1	83.9	22.9	27.3	15.2	50.9	245	11.4	14.7	0.279	1	0	0	0
428T	1	0	4	145	36	18	29	2	12	1	0	1	0	0	0	0	1	0	0	5	˂6	672	6.1	2.3	0.6	3.2	38.1	10.3	51.6	11.2	4.61	41.1	89.2	24.2	27.2	16.4	53.9	186	12	14.9	0.223	3	0	0	0
429T	1	1	1	321	55	2	5	6	72	1	60	0	0	0	0	0	0	0	1	1	12	1159	6.8	3.3	0.7	2.8	47.6	10.5	41.9	13.9	5.13	47.2	92.2	27	29.4	12.8	43.7	143	10.8	15.3	0.154	4	0	0	0
430T	1	1	3	47	22	33	5	6	2	0	1	0	0	0	0	0	0	0	1	12	6	841	3.9	1.8	0.4	1.7	45.6	9.9	44.5	13	5.5	46.8	85.2	23.6	27.7	14.6	48.8	233	9.6	14.6	0.223	1	0	0	0
431T	1	0	1	224	48	2	17	1	96	1	84	0	0	0	0	0	0	1	1	12	˂6	762	5	2.1	0.4	2.5	41.4	8.8	49.8	14.6	5.96	51.7	86.8	24.4	28.2	13.4	46.7	254	9.9	14.9	0.251	3	0	0	0
432T	1	0	1	223	67	15	5	6	360	1	336	0	0	0	0	0	0	0	1	1	˂6	825	4.9	1.6	0.4	2.9	31.7	9.1	59.2	12.3	5.07	45	88.8	24.2	27.3	13.9	49.8	298	9.3	14.4	0.277	2	0	0	0
433T	1	1	1	98	45	21	20	7	10	1	0	1	0	0	0	0	1	0	0	11	˂6	806	6	2.1	0.4	3.5	34.2	7.1	58.7	13.7	5.11	47.3	92.6	26.8	28.9	12.7	44.8	208	8.8	14.4	0.183	2	0	0	0
434T	1	1	1	104	63	26	3	3	2	1	0	1	0	0	0	0	1	0	0	12	24	906	5.2	2.5	0.5	2.2	47	10.3	42.7	12	4.69	42.1	89.9	25.5	28.5	13.9	47.9	207	10.6	14.7	0.219	2	0	0	0
435T	1	0	4	77	48	2	32	6	24	1	24	0	0	0	0	0	0	0	1	3	˂6	807	5.6	2.4	0.6	2.6	43.4	11	45.6	13.8	5.06	48.6	96.1	27.2	28.3	13.8	50.9	248	11.1	15.1	0.275	3	0	0	0
436T	1	1	2	92	74	2	3	6	96	1	96	0	1	0	0	0	0	0	1	12	˂6	902	6	3.4	0.6	2	56.9	9.9	33.2	12.5	4.71	44	93.5	26.5	28.4	13	46.7	160	11.8	15.2	0.188	1	0	0	0
437T	1	1	1	296	35	6	30	8	96	1	96	0	0	0	0	0	0	0	1	8	˂6	786	3.5	1.6	0.4	1.5	45.4	10.7	43.9	8.1	4.3	29.6	68.9	18.8	27.3	19	47.9	205	9.9	14.1	0.202	4	0	0	0
438T	1	1	1	140	56	2	2	7	84	1	84	1	0	0	0	0	1	1	1	7	6	786	5.5	2	0.5	3	37.2	8.7	54.1	12.1	5.08	44	86.7	23.8	27.5	14.3	47.9	303	9.5	14.5	0.287	4	0	0	0
439T	1	1	1	156	56	2	2	11	276	1	240	0	0	0	0	0	0	1	1	12	24	763	12.1	2.6	0.8	8.7	21.2	7.1	71.7	13.3	4.95	45.2	91.4	26.8	29.4	12.6	39.6	261	9.6	14.5	0.25	3	0	0	0
440T	1	0	1	225	63	2	1	2	12	1	0	1	0	0	0	0	1	0	0	12	˂6	705	4.9	2	0.3	2.6	40.1	7	52.9	14.6	5.98	51.6	86.3	24.4	28.2	13.6	46.7	270	9.8	14.7	0.264	2	0	0	0
441T	1	1	1	323	46	13	3	3	60	1	24	1	0	1	1	1	1	1	1	11	12	771	4.4	1.5	0.3	2.3	40.1	9.6	52.5	13.2	5.1	46.1	86.1	23.4	29.1	14.5	39.5	186	10.1	13.9	0.235	2	0	0	0
442T	1	1	1	212	42	8	3	3	2	1	0	0	0	0	0	0	0	1	0	5	12	649	5.1	2.3	0.4	2.5	43.5	8.7	53.2	12.1	5.02	43.5	88.1	24.1	27.1	16.1	54.1	188	9.8	14.2	0.189	1	0	0	0
443T	1	1	1	196	43	2	4	3	36	1	12	0	1	0	0	0	0	0	0	12	12	716	2.3	1.5	0.3	1.7	44.6	8.8	48.7	11.9	4.98	41.2	89.1	25.4	28.1	13.8	50.3	284	10.2	14.2	0.188	1	0	0	0
444T	1	1	1	210	39	6	29	1	10	1	0	0	0	0	0	1	0	0	0	12	24	908	4.7	2.6	0.6	2.1	43.9	8.6	48.9	11.5	5.01	41.6	88.2	24.3	26.8	16.3	46.2	185	10.2	14.3	0.245	2	0	0	1	4	R	S	S
445T	1	0	1	189	33	6	13	1	2	1	0	1	0	0	0	0	1	0	0	12	˂6	653	3.8	1.4	0.4	1.8	46.6	9.9	45.1	12.1	5.12	43.4	90.1	25.2	28.3	12.6	45.1	289	9.6	13.9	0.238	2	0	0	0
446T	1	0	1	305	44	15	5	3	11	1	0	0	0	0	0	0	0	0	0	1	˂6	523	3.7	1.5	0.5	1.7	45.2	9.7	46.3	12.3	5.2	45.1	87.2	23.9	28.1	16.5	48.1	245	11.2	14.2	0.187	2	0	0	0
447T	1	0	1	256	56	2	1	2	24	1	2	0	1	0	0	0	0	1	1	6	˂6	704	4.2	2.3	0.6	2.1	43.5	10.1	42.1	11.1	4.59	40.2	89.3	24.3	28.6	15.9	44.9	266	11.2	13.8	0.154	2	0	0	0
448T	1	1	4	285	58	2	1	8	36	1	12	0	1	0	1	0	0	0	1	1	˂6	1025	3.3	1.2	0.3	2.1	42.9	9.7	45.2	13.3	5.1	44.9	92.1	27.1	29.6	13.6	43.6	245	10.9	14.5	0.178	3	0	0	0
449T	1	0	1	256	52	18	3	6	24	1	3	0	0	0	0	0	0	1	1	12	˂6	982	3.2	1.1	0.3	2.2	42.2	10	52.3	12.1	5.01	43.9	87.2	25.6	27.1	14.1	48.7	247	11.2	14.6	0.255	2	0	0	0
450T	1	1	4	160	41	1	4	2	11	1	0	0	0	0	0	0	0	0	0	5	˂6	1328	5.2	2.8	0.7	2.3	43.1	11.2	63.2	12.6	5.13	45.8	88.8	24.1	27.6	13.8	49.6	249	11.1	14.1	0.189	3	0	0	0
451T	1	1	1	220	45	1	7	8	6	1	1	1	0	1	0	0	0	0	0	12	˂6	964	5.1	2.4	0.6	2.2	43.2	10.1	55.2	11.8	4.88	41.8	86.1	25.3	27.9	13.7	48.2	285	9.3	14.4	0.264	4	0	0	0
452T	1	0	1	205	39	34	14	11	12	1	0	1	0	0	1	0	1	0	1	12	˂6	625	2.3	1.3	0.4	1.6	45.2	8.4	44.9	12.7	5.01	45.1	83.2	23.1	28.1	14.1	45.9	279	9.1	14.6	0.243	1	0	0	0
453T	1	1	1	202	36	51	5	6	12	1	4	1	0	0	0	0	1	1	1	12	6	754	4.4	2.3	0.5	2.4	43.1	8.3	45.8	11.9	4.89	42.1	84.2	23.5	27.9	13.9	48.1	247	9.2	14.5	0.241	1	0	0	0
454T	1	1	1	198	45	27	5	3	2	1	0	1	0	0	0	0	1	1	0	12	12	664	3.3	1.5	0.4	1.8	45.3	10.2	49.1	12.6	4.87	46.1	85.6	23.9	27.8	13.8	49.2	251	10.2	14.8	0.255	3	0	0	0
455T	1	1	1	201	52	2	27	8	3	1	0	0	0	0	0	1	0	0	0	1	24	744	3.4	1.6	0.4	1.7	42.4	9.8	51.2	14.2	5.78	48.8	93.1	26.1	29.6	13.1	40.6	279	10.6	15.1	0.278	1	0	0	0
01C	0	1	1	97	72	1	1	1				1	1	0	0	0	1	0	0	3	˂6	608	4.4	2.4	0.4	1.6	54.2	9.1	36.7	13.3	4.8	44	91.7	27.7	30.2	14.3	49.8	216	9.6	14.8	0.207	2	60	0	0
02C	0	1	1	86	46	1	2	5				1	1	0	1	0	1	0	1	1	6	617	3.9	2.6	0.21	3.8	40.2	10.5	40.2	12.5	4.7	43	83.6	26.2	28.5	13.1	40.1	180	8.8	14.2	0.145	5	460	800	1	4	R	S	S
03C	0	1	1	97	43	1	1	3				1	1	0	1	0	1	1	0	2	˂6	796	6.2	2.2	0.7	3.3	36.1	11.4	52.5	11	4.84	38.3	79.3	22.7	28.7	16.1	45.7	262	10	14.7	0.262	1	0	0	0
04C	0	1	2	80	13	1	3	3				1	1	1	0	1	1	0	0	1	˂6	908	6.3	2.2	0.6	3.5	35.1	9.2	55.7	10.3	4.43	35	79.1	23.2	29.4	19.8	52.8	525	9.4	14.6	0.493	5	0	0	0
05C	0	1	1	90	69	1	4	2				0	1	0	0	0	0	0	0	3	6	439	6.4	4.5	0.9	1	70.1	13.6	16.3	7.1	2.67	26.7	100	26.5	26.5	16	31.1	14	10.1	15.7	0.014	1	0	0	0
06C	0	1	1	75	28	1	5	6				0	0	0	0	0	0	0	0	1	96	1141	6.4	2	0.3	4.1	31.3	5.2	63.5	13.4	4.59	43.4	94.6	29.1	30.8	13	41.7	277	9.7	14.6	0.268	1	0	0	0
07C	0	1	1	90	33	1	7	6				0	1	0	0	0	0	1	0	1	˂6	2564	5.7	3	0.5	2.2	52.9	9.1	38	11.1	3.88	36.4	93.9	28.6	30.4	12.8	41.7	232	8.9	14.8	0.206	2	20	0	1	1
08C	0	0	2	85	30	1	6	7				0	0	0	0	0	0	0	0	1	˂6	854	5.8	2.1	0.5	3.2	36.9	8.6	54.5	17.3	6.2	56.7	91.5	27.9	30.5	12.8	46.7	305	10.5	14.5	0.32	2	0	0	0
09C	0	0	2	77	24	1	2	6				0	0	0	0	0	0	0	0	1	˂6	561	4	2.3	0.3	1.4	57.9	7.6	34.5	12.8	4.75	40.8	86	26.9	31.3	13	40.6	284	9.2	14.2	0.261	2	0	0	0
10C	0	1	1	85	30	1	7	6				0	0	0	0	0	0	0	0	1	˂6	473	6.3	2.5	0.4	3.4	39.9	6.3	53.8	12.8	4.94	42.5	86.1	25.9	30.1	14.7	42.7	149	10.9	15.2	0.162	1	40	0	1	4	R	S	R
11C	0	0	1	92	63	1	8	6				0	1	0	1	0	0	0	0	1	˂6	463	4.2	1.7	0.3	2.2	39.6	9.2	51.2	15.1	5.1	49	96.2	29.6	30.8	13.2	45.7	180	8.3	14.2	0.149	1	0	0	0
12C	0	0	1	93	45	1	8	7				0	1	0	0	0	0	0	0	1	˂6	736	7.4	2.3	0.5	4.6	31.4	6.5	62.1	13.5	5.01	43.9	87.8	26.9	30.7	13.6	43.7	211	10.1	14.8	0.213	2	0	0	0
13C	0	0	1	82	56	1	6	6				0	0	0	0	0	0	0	0	4	˂6	1050	3.8	2.1	0.3	1.4	54.3	9.1	36.6	15.9	5.71	52.8	92.6	27.8	30.1	12.7	45.7	195	9.7	14.3	0.189	2	0	0	0
14C	0	0	2	70	28	1	8	8				0	0	0	0	0	0	0	0	1	˂6	932	4.3	2.4	0.4	1.5	55.1	9.5	35.4	14	5.37	47.5	88.5	26	29.4	13.9	43.7	191	10.4	14.9	0.198	1	0	0	0
15C	0	1	2	88	21	1	10	6				0	0	1	1	0	0	0	0	1	˂6	1181	4.3	2.3	0.5	1.5	52.7	11.6	35.7	11.5	4.72	40	84.8	24.3	28.7	14	43.7	216	9.6	14.5	0.207	1	120	20	1	2
16C	0	1	1	99	51	1	4	2				0	0	1	0	0	0	1	0	5	˂6	1023	4.7	2.4	0.4	1.9	52.1	8.2	39.7	9	4.94	34.1	69.1	18.2	26.3	18.3	43.7	313	10.6	15.2	0.331	2	40	200	1	3
17C	0	0	2	75	25	1	9	7				0	0	0	0	0	0	0	0	3	˂6	959	5	2.4	0.5	2.1	48	10.6	41.4	14.4	5.61	47.9	85.5	25.6	30	13.6	41.7	205	9.6	14.7	0.196	1	0	0	0
18C	0	0	2	85	24	2	9	7				0	0	0	0	0	0	0	1	1	˂6	1164	6.1	3.2	0.6	2.3	52.1	10.3	13.8	5.88	48.5	82.6	23.4	28.4	15.1	43.7	253	9.5	14.5	0.24	0.24	1	0	0	0
19C	0	1	2	91	23	5	7	6				0	0	0	0	0	0	0	1	1	˂6	662	3.7	1.6	0.3	1.8	43.3	8.7	48	10.4	4.86	35.8	73.7	21.3	29	18	46.7	328	10.2	14.7	0.334	1	0	0	0
20C	0	1	2	92	25	2	2	6				0	0	0	0	0	0	0	0	1	˂6	1124	5.4	3.1	0.3	2	57	6.5	36.5	12.4	4.91	41.2	84.1	25.2	30	14.6	42.7	215	9.9	14.7	0.212	2	0	0	0
21C	0	1	2	75	21	1	9	6				0	0	0	0	0	0	0	0	1	˂6	922	4.6	2	0.5	2.1	44.1	9.8	46.1	13.3	4.89	44	90	27.1	30.2	13.8	45.7	287	8.7	14.4	0.249	1	0	0	0
22C	0	1	2	80	23	3	9	7				0	0	0	1	0	0	0	0	1	˂6	953	4.3	2.2	0.2	1.9	50.6	6.3	43.1	11.7	5.27	40.3	76.6	22.2	29	15.1	41.7	296	9.4	14.7	0.278	1	0	0	0
23C	0	0	2	85	19	4	3	3				1	0	0	0	0	0	0	0	4	12	684	7.2	2.2	0.7	4.3	30	10	60	14.8	5.46	49.4	90.6	27.1	29.9	12.8	43.7	284	9.7	14.5	0.275	1	0	0	0
24C	0	1	1	70	48	1	2	4				1	1	1	0	0	0	0	0	4	˂6	958	4.5	1.2	0.7	2.6	27.2	16.4	53.5	11.6	5.4	49.1	75.2	25.9	29.1	13.9	44.8	224	8.8	14.2	0.196	4	160	40	1	5
25C	0	0	1	91	42	1	11	4				1	1	0	1	0	0	0	1	5	˂6	1050	10.4	1.1	1	8.3	10.9	9.8	79.3	13	5.2	44.5	85.6	25	29.2	14.6	45.7	198	9.1	14.5	0.18	5	240	100	0
26C	0	0	1	78	50	9	6	7				1	1	1	1	0	0	0	0	4	6	916	6.2	2.8	0.6	2.8	45.2	9.5	45.3	16.1	6.02	54	89.8	26.7	29.8	13.8	45.7	247	9.6	14.5	0.237	1	20	0	0
27C	0	1	2	88	30	1	2	6				0	0	0	0	0	0	0	0	1	˂6	1160	4	2.1	0.4	1.5	53.6	9.1	37.3	13.3	4.98	44.9	90.2	26.7	29.6	14.9	47.9	296	8.9	14.2	0.263	1	40	60	0
28C	0	0	2	71	30	1	2	6				0	0	0	0	0	0	0	0	4	˂6	717	4.3	1.2	0.7	2.6	27.2	16.4	56.4	14.3	5.52	49.1	89.1	25.9	29.1	13.9	44.8	237	9.9	14.6	0.234	1	0	0	0
29C	0	0	1	90	49	1	5	6				0	0	0	0	0	0	0	0	1	24	704	4.8	1.9	0.4	2.5	39.1	9.4	51.5	13.2	4.78	44.1	92.3	27.6	29.9	13.5	44.8	271	10.2	14.7	0.276	1	0	0	0
30C	0	0	1	89	55	4	2	2				0	0	0	0	0	0	0	0	1	12	683	5.5	2.9	0.5	2.1	51.9	10.5	37.6	14.6	5.71	48.7	85.3	25.5	29.9	13.9	42.7	197	8.9	14.4	0.175	1	0	0	0
31C	0	1	1	113	48	1	5	6				0	0	0	0	0	0	0	0	1	6	808	3.9	2.2	0.2	1.5	55.4	6.8	37.8	12.4	4.74	42.4	89.5	26.1	29.2	13.9	44.8	188	11.2	14.6	0.21	1	0	0	0
32C	0	0	2	110	25	1	3	5				0	0	0	0	0	0	0	0	1	˂6	1205	7.2	3.6	0.6	3	50.1	7.7	42.2	16.6	6.15	56.8	92.4	26.9	29.2	13.8	49.8	241	9.9	14.8	0.238	1	0	0	0
33C	0	0	1	105	50	10	2	5				0	0	0	0	0	0	0	0	1	48	780	3.3	1.5	0.3	1.5	45.7	7.7	46.6	13.4	4.95	46	93	27	29.1	12.7	41.7	135	9.9	14.6	0.133	1	0	0	1	2
34C	0	1	3	102	49	1	6	6				0	0	0	0	0	0	0	0	3	24	813	6.1	2.1	0.5	3.5	35.2	8.7	56.1	7.3	3.82	27.8	73	19.1	26.2	17.3	45.7	237	9.1	14.6	0.215	1	0	0	0
35C	0	1	2	96	20	1	3	5				0	0	0	0	0	0	0	0	1	6	737	5.3	1.9	0.4	3	36.2	6.8	57	12.3	4.67	42.1	90.2	26.3	29.2	13	44.8	259	9.2	14.4	0.238	1	0	0	0
36C	0	1	2	90	16	1	3	5				0	0	0	0	0	0	0	0	1	12	919	3.4	1.7	0.3	1.4	49.5	8.8	41.7	12	5	42.8	85.7	24	28	15.5	50.9	235	10.2	14.7	0.239	1	0	0	0
37C	0	0	2	98	25	1	9	7				0	0	0	0	0	0	0	0	1	˂6	782	4.3	2.1	0.2	2	47.8	6.7	45.5	14.3	6.13	52.4	85.6	23.3	27.2	14.6	47.9	258	9.6	14.8	0.247	1	0	0	0
38C	0	0	2	115	27	4	9	7				0	0	0	0	0	0	0	0	1	˂6	1301	5.7	3	0.4	2.3	53	7.5	39.5	15.4	5.83	52.8	90.7	26.4	29.1	13.4	43.7	191	9.8	14.7	0.187	3	0	0	0
39C	0	1	1	109	30	7	1	6				0	0	0	0	0	0	0	0	1	24	1002	7.2	2.7	0.6	3.9	37.5	7.9	54.6	13.1	4.85	47.9	98.9	27	27.3	13.9	55	153	10.3	15.1	0.157	1	0	0	0
40C	0	0	1	108	35	4	12	6				0	0	0	0	0	0	0	0	1	˂6	685	4.3	2	0.5	1.8	45.6	12	42.4	12.2	4.74	48	101.4	25.7	25.4	15.5	55	311	9.8	14.8	0.304	3	0	0	0
41C	0	1	1	101	42	6	4	9				0	0	0	0	0	0	0	0	1	96	1322	11.3	6	1	4.3	53.1	9.2	37.7	12.8	5.39	45.9	85.2	23.7	27.8	14.6	49.8	98	10.4	15	0.101	3	0	0	0
42C	0	1	3	105	43	1	6	6				0	0	0	0	0	0	0	0	1	12	857	6	2.8	0.7	2.5	46.1	12	41.9	9	4.2	35.7	85.2	21.4	25.2	26.1	72.3	376	9.9	14.6	0.372	3	0	0	0
43C	0	0	1	99	46	7	5	6				0	0	0	0	0	0	0	0	1	12	815	3.8	2.4	0.3	1.1	62.7	9	28.3	12.1	4.55	41.2	90.7	26.5	29.3	13.8	48.8	269	11.2	14.6	0.301	2	0	0	0
44C	0	0	2	80	31	4	11	5				0	0	0	0	0	0	0	0	1	6	619	5	2.7	0.4	1.9	53.5	8.6	37.9	13.6	5.3	47.4	89.5	25.6	28.6	13.9	49.8	186	10	14.6	0.186	1	0	0	0
45C	0	0	2	81	28	8	9	8				0	0	0	0	0	0	0	0	1	˂6	969	4.6	1.7	0.8	2.1	35.9	19	45.1	13.1	5.72	48.3	84.6	22.9	27.1	14.6	48.8	244	9.9	14.6	0.241	1	0	0	0
46C	0	0	2	79	23	1	3	5				0	0	0	0	0	0	0	0	1	˂6	802	4.2	1.9	0.6	1.7	43.2	15.4	41.4	14.9	5.55	53.4	96.3	26.8	27.9	15.2	56.9	165	10.2	14.9	0.168	3	0	0	0
47C	0	1	2	83	21	1	3	5				0	0	0	0	0	0	0	0	1	˂6	612	4.9	2.3	0.5	2.1	46.1	11.2	42.7	11.8	4.85	44	90.8	24.3	26.8	17	55.9	186	9.4	14.4	0.174	1	0	0	0
48C	0	1	2	82	20	1	3	5				0	0	0	0	0	0	0	0	1	˂6	589	6.1	2.7	0.5	2.9	44.5	8.2	47.3	13.7	4.88	49.5	101.5	28	27.6	14.9	56.9	284	8.8	14.4	0.249	2	0	0	0
49C	0	1	2	98	21	1	3	5				0	0	0	0	0	0	0	0	1	˂6	912	4.7	2.3	0.5	1.9	49	10.6	40.4	11.8	4.89	43.8	89.6	24.1	26.9	16.4	55.9	193	9.7	14.7	0.187	2	0	0	0
50C	0	1	2	89	22	1	3	5				0	0	0	0	0	0	0	0	1	˂6	619	4.9	2.1	0.7	1.8	47	10.1	39.2	11.6	4.46	40	89.8	26	29	13.6	44.8	146	9.7	14.7	0.141	3	0	0	0
[truncated: 7 more columns]
